# Supplementary material for: East Indian sandalwood (Santalum album L.) oil confers neuroprotection and geroprotection inCaenorhabditis elegans viaactivating SKN-1/Nrf2 signaling pathway
Source: Royal Society of Chemistry journal article supplement (doi:10.1039/c8ra05195j), 2018-01-01

## Electronic Supplementary Information

**East Indian sandalwood (*Santalum album* L.) oil confers neuroprotection and geroprotection in *Caenorhabditis elegans* via activating SKN-1/Nrf2 signaling pathway**

**A. Mohankumar <sup>a\*</sup>, G. Shanmugam <sup>a</sup>, D. Kalaiselvi <sup>a</sup>, C. Levenson <sup>b</sup>, S. Nivitha <sup>c</sup>, G. Thiruppathi <sup>a</sup>, P. Sundararaj <sup>a\*</sup>**

<sup>a</sup>Unit of Nematology, Department of Zoology, Bharathiar University, Coimbatore, Tamilnadu-641046, India.

<sup>b</sup>Santalus Pharmaceuticals Inc., 18618 Tuscany Stone, Suite 100, San Antonio, Texas 78258, USA.

<sup>c</sup>College of Science, Northeastern University, Boston, Massachusetts 02115, USA.

**\*Correspondence to:**

Dr. P. Sundararaj or A. Mohankumar  
Unit of Nematology, Department of Zoology  
Bharathiar University, Coimbatore, Tamilnadu-641046, India.  
E-mail: [sunpalan@gmail.com](mailto:sunpalan@gmail.com) or [amkkmohan@gmail.com](mailto:amkkmohan@gmail.com)  
Tel: +91-9943340405 or +91-9677667720  
Fax: +91-422-2422387.

## TABLE OF CONTENTS

| S. No.         | Title                                                                                               | Page |
|----------------|-----------------------------------------------------------------------------------------------------|------|
| <b>Tables</b>  |                                                                                                     |      |
| 1.             | Genotypic and phenotypic description of <i>C. elegans</i> strains used.....                         | 3    |
| 2.             | Toxicity assessment of EISO, $\alpha$ - and $\beta$ -santalols on wild type <i>C. elegans</i> ..... | 6    |
| 3.             | Effect of EISO, $\alpha$ - and $\beta$ -santalol on the reproduction and growth .....               | 7    |
| 4.             | Lifespan analysis of NL5901 <i>C. elegans</i> .....                                                 | 9    |
| 5.             | EISO and santalol isomers mediated longevity in wild-type <i>C. elegans</i> .....                   | 10   |
| 6.             | Influences of EISO, $\alpha$ - and $\beta$ -santalol on CED-1::GFP expression .....                 | 11   |
| 7.             | Genetic requirement for EISO, $\alpha$ - and $\beta$ -santalol-mediated geroprotection ...          | 12   |
| 8.             | Predicted ADME properties of santalol isomers .....                                                 | 14   |
| <b>Figures</b> |                                                                                                     |      |
| 1.             | Effect on the development and morphology of GABAergic motor neurons...                              | 15   |
| 2.             | Beneficial effect of EISO on the lifespan of NL5901 <i>C. elegans</i> .....                         | 16   |
| 3.             | ROS level and germ cell apoptosis in mitochondrial ETC pathway mutants..                            | 17   |
| 4.             | Effect of EISO, $\alpha$ - and $\beta$ -santalol on the expression of <i>skn-1::gfp</i> transgene.. | 18   |
| 5.             | Relative expression of <i>ctl-1,2,3p::GFP</i> transgene in GA800 <i>C. elegans</i> .....            | 19   |
| 6.             | Interaction of $\alpha$ - and $\beta$ -santalol with Klech domain of Keap1.....                     | 20   |
| 7.             | Validation of the modeled WDR-23 protein structure.....                                             | 21   |
| 8.             | Ramachandran plot of modeled WDR-23 protein.....                                                    | 23   |
| 9.             | Certificate of analysis ( $\alpha$ -Santalol).....                                                  | 24   |
| 10.            | Certificate of analysis ( $\beta$ -Santalol).....                                                   | 33   |

Table 1

| Genotype               | Gene description                                                                                                                                                                                                     | Phenotype                                                                      |
|------------------------|----------------------------------------------------------------------------------------------------------------------------------------------------------------------------------------------------------------------|--------------------------------------------------------------------------------|
| N2                     |                                                                                                                                                                                                                      | Wild type                                                                      |
| <i>mev-1 (kn1)</i>     | <i>mev-1</i> encodes succinate dehydrogenase cytochrome b560 subunit of mitochondrial respiratory chain complex II, which is essential for oxidative phosphorylation                                                 | Stress and oxygen sensitive. Short life span                                   |
| <i>isp-1 (qm150)</i>   | <i>isp-1</i> encodes a Rieske iron sulphur protein (ISP) which is a subunit of the mitochondrial complex III                                                                                                         | Low oxygen consumption, resistance to stress, slow development, and long lived |
| <i>clk-1 (e2519)</i>   | <i>clk-1</i> encodes demethoxyubiquinone (DMQ) hydroxylase that is necessary for the biosynthesis of ubiquinone                                                                                                      | Low oxygen consumption, resistance to stress, slow development, and long lived |
| <i>daf-2 (e1370)</i>   | <i>daf-2</i> encodes a receptor tyrosine kinase that is the <i>C. elegans</i> insulin/IGF receptor ortholog. DAF-2 regulates various biological process                                                              | Long lived, Temperature sensitive dauer constitutive                           |
| <i>akt-1 (ok525)</i>   | <i>akt-1</i> encodes an ortholog of the serine/threonine kinase Akt/PKB and downstream of IIS pathway                                                                                                                | Long lived                                                                     |
| <i>daf-16 (mgDf50)</i> | <i>daf-16</i> encodes <i>C. elegans</i> homologue of forkhead box O (FOXO) transcription factor regulates dauer formation, longevity, fat metabolism, stress response, and innate immunity in a IIS dependent manner | Dauer defective. Short lived                                                   |
| <i>lin-45 (n2520)</i>  | <i>lin-45</i> encodes an ortholog of the RAF family of serine/threonine kinases (MAPKKK) and is necessary for larval viability and vulval differentiation. LIN-45 is an upstream regulator of ERK MAPK               |                                                                                |
| <i>mek-2 (n1989)</i>   | <i>mek-2</i> encodes a MAP kinase kinase and it function as core regulator of Ras-mediated signaling in the regulation of multiple biological processes                                                              |                                                                                |

|                                       |                                                                                                                                                                                                                                                                          |                                                                                           |
|---------------------------------------|--------------------------------------------------------------------------------------------------------------------------------------------------------------------------------------------------------------------------------------------------------------------------|-------------------------------------------------------------------------------------------|
| <i>mpk-1 (ku1)</i>                    | <i>mpk-1</i> encodes a <i>C. elegans</i> ortholog of ERK MAPK                                                                                                                                                                                                            | Susceptibility to pathogens                                                               |
| <i>skn-1 (zu67)</i>                   | <i>skn-1</i> encodes basic-leucine zipper transcription factor orthologous to the mammalian Nrf                                                                                                                                                                          |                                                                                           |
| <i>wdr-23 (tm1817)</i>                | <i>wdr-23</i> encodes a WD40 repeat-containing protein; WDR-23 functions as part of a CUL-4/DDB-1 ubiquitin ligase complex that negatively regulates accumulation and hence, transcriptional activation activity of the SKN-1 transcription factor in intestinal nuclei. | Long lived, resistance to stress                                                          |
| <i>egl-1 (n1084n3082)</i>             | <i>egl-1</i> encodes a novel protein that contains a region similar to the BH3 (Bcl-2 homology region 3) domain of mammalian cell death activators                                                                                                                       |                                                                                           |
| <i>ced-9 (n1950)</i>                  | <i>ced-9</i> encodes the sole <i>C. elegans</i> homolog of the mammalian cell-death inhibitor Bcl-2.                                                                                                                                                                     | Dominant maternal effect. Survival of cells which normally undergo programmed cell death. |
| <i>ced-4 (n1162)</i>                  | <i>ced-4</i> encodes a novel protein; along with CED-3, CED-4 is required for the initiation of programmed cell death                                                                                                                                                    |                                                                                           |
| <i>ced-3 (n717)</i>                   | <i>ced-3</i> encodes a caspase, a cysteine-aspartate protease; CED-3 activity is required for execution of apoptosis and functions in a conserved genetic pathway with CED-4, CED-9, and EGL-1 to regulate apoptosis during <i>C. elegans</i> development.               | Abnormal cell death. Cells that normally die survive                                      |
| <i>oxIs12 (unc-47p::GFP + lin-15)</i> | <i>unc-47p::GFP</i>                                                                                                                                                                                                                                                      | Expression of GFP in all eight GA neurons.                                                |
| <i>ldIs7 (skn-1::GFP)</i>             | <i>skn-1 b/c::GFP</i>                                                                                                                                                                                                                                                    | Stress-inducible expression of GFP in intestinal nuclei and ASI neurons, roller           |
| <i>dvIs19 (gst-4::GFP)</i>            | <i>gst-4p::GFP</i>                                                                                                                                                                                                                                                       | Oxidative stress-inducible/SKN-1 dependent GFP expression in whole body                   |
| <i>ldIs3 (gcs-1::GFP)</i>             | <i>gcs-1p::GFP</i>                                                                                                                                                                                                                                                       | Oxidative stress-inducible/SKN-1 dependent GFP expression in pharynx and mid-body         |



|                                                                                                                                                                                                                                         |                                      |                                                                                  |
|-----------------------------------------------------------------------------------------------------------------------------------------------------------------------------------------------------------------------------------------|--------------------------------------|----------------------------------------------------------------------------------|
| <i>wuIs151 (ctl-1,2,3::GFP)</i>                                                                                                                                                                                                         | <i>ctl-1,2,3p::GFP</i>               | Expression of GFP in pharynx region, slow growing                                |
| <i>bcIs39 (lim-7p::ced-1::GFP + lin-15)</i>                                                                                                                                                                                             | <i>ced-1::GFP</i>                    | Expression of functional CED-1::GFP fusion protein in the sheath cells.          |
| <i>opIs3 (hus-1::GFP)</i>                                                                                                                                                                                                               | <i>hus-1::GFP</i>                    | Nuclear expression of GFP in germ cells and embryos                              |
| <i>pkIs2386 (unc-54p::alpha-synuclein::YFP+unc-119)</i>                                                                                                                                                                                 | <i>unc-54p::alpha-synuclein::YFP</i> | Expression of YFP fused $\alpha$ -synuclein expression in body wall muscle cells |
| <i>egIs1 (dat-1p::GFP)</i>                                                                                                                                                                                                              | <i>dat-1p::GFP</i>                   | GFP observable in all eight DA neuron soma and processes                         |
| Gene and phenotype description of worm strains used also available at wormbase ( <a href="http://www.wormbase.org">www.wormbase.org</a> ), and Caenorhabditis Genetics Centre ( <a href="http://www.cgc.umn.edu">www.cgc.umn.edu</a> ). |                                      |                                                                                  |

**Table 1.** Genotypic and phenotypic description of *C. elegans* strains used.

Table 2

|                                               | Treatment     | EISO             | Treatment  | $\alpha$ -Santalol | $\beta$ -Santalol |
|-----------------------------------------------|---------------|------------------|------------|--------------------|-------------------|
|                                               |               | % Survival       |            | % Survival         | % Survival        |
| <b>Acute Exposure (24 h from L4 stage)</b>    | Control       | 100              | Control    | 100                | 100               |
|                                               | 3 $\mu$ g/mL  | 98.86 $\pm$ 0.58 | 2 $\mu$ M  | 100                | 99.54 $\pm$ 0.46  |
|                                               | 6 $\mu$ g/mL  | 99.34 $\pm$ 0.44 | 4 $\mu$ M  | 99.68 $\pm$ 0.32   | 98.63 $\pm$ 0.95  |
|                                               | 12 $\mu$ g/mL | 100              | 8 $\mu$ M  | 99.70 $\pm$ 0.30   | 100               |
|                                               | 24 $\mu$ g/mL | 100              | 16 $\mu$ M | 99.18 $\pm$ 0.55   | 99.72 $\pm$ 0.28  |
|                                               | 48 $\mu$ g/mL | 98.75 $\pm$ 0.63 | 32 $\mu$ M | 99.12 $\pm$ 0.61   | 99.07 $\pm$ 0.92  |
|                                               |               |                  | 64 $\mu$ M | 99.13 $\pm$ 0.58   | 99.35 $\pm$ 0.43  |
| <b>Chronic Exposure (120 h from L1 stage)</b> | Control       | 88.41 $\pm$ 2.13 | Control    | 88.96 $\pm$ 1.93   | 86.05 $\pm$ 1.71  |
|                                               | 3 $\mu$ g/mL  | 87.90 $\pm$ 2.64 | 2 $\mu$ M  | 87.76 $\pm$ 2.34   | 85.84 $\pm$ 2.34  |
|                                               | 6 $\mu$ g/mL  | 87.97 $\pm$ 2.17 | 4 $\mu$ M  | 87.22 $\pm$ 1.55   | 86.32 $\pm$ 2.23  |
|                                               | 12 $\mu$ g/mL | 90.60 $\pm$ 2.28 | 8 $\mu$ M  | 86.03 $\pm$ 1.82   | 90.98 $\pm$ 1.86  |
|                                               | 24 $\mu$ g/mL | 92.48 $\pm$ 2.14 | 16 $\mu$ M | 92.81 $\pm$ 0.82   | 92.73 $\pm$ 1.23  |
|                                               | 48 $\mu$ g/mL | 89.70 $\pm$ 1.67 | 32 $\mu$ M | 93.98 $\pm$ 1.19   | 90.07 $\pm$ 1.96  |
|                                               |               |                  | 64 $\mu$ M | 90.51 $\pm$ 1.52   | 89.08 $\pm$ 1.92  |

**Table 2.** Toxicity assessment of EISO,  $\alpha$ - and  $\beta$ -santalols on wild type *C. elegans*. Acute and chronic exposure to various pharmacological doses/molarities of EISO and its principal components did not significantly affect the survival of nematodes (n=20~25/replicate) compared to control at 20°C. Data are presented as mean $\pm$ SEM of three independent runs, and analyzed by one way analysis of variance (ANOVA) followed by Bonferroni post-hoc test.

Table 3

| Strain     | Treatment  |          | Brood size<br>(Mean±SEM) | % Change    | Body length<br>(mm) | %<br>Change |
|------------|------------|----------|--------------------------|-------------|---------------------|-------------|
| N2         | EISO       | Control  | 257.78±4.29              |             | 1.19±0.03           |             |
|            |            | 3 µg/mL  | 258.00±6.15              | (+) 0.09    | 1.21±0.03           | (+) 1.68    |
|            |            | 6 µg/mL  | 257.22±6.16              | (-) 0.22    | 1.18±0.04           | (-) 0.84    |
|            |            | 12 µg/mL | 254.78±4.23              | (-) 1.16    | 1.19±0.03           | 0           |
|            |            | 24 µg/mL | 258.33±3.36              | (+) 0.21    | 1.20±0.03           | (+) 0.42    |
|            |            | 48 µg/ml | 254.00±5.40              | (-) 1.47    | 1.19±0.05           | 0           |
|            | α-Santalol | Control  | 259.89±3.81              |             | 1.22±0.03           |             |
|            |            | 2 µM     | 255.89±6.77              | (-) 1.54    | 1.20±0.04           | (-) 1.65    |
|            |            | 4 µM     | 256.44±5.18              | (+) 0.21    | 1.21±0.04           | (+) 1.26    |
|            |            | 8 µM     | 255.44±4.46              | (-) 1.71    | 1.20±0.05           | (-) 1.23    |
|            |            | 16 µM    | 256.44±4.43              | (-) 1.33    | 1.19±0.04           | (-) 2.47    |
|            |            | 32 µM    | 254.00±5.40              | (-) 2.27    | 1.20±0.05           | (-) 3.29    |
|            |            | 64 µM    | 258.00±6.54              | (-) 0.73    | 1.21±0.06           | (-) 0.82    |
|            | β-Santalol | Control  | 257.56±3.90              |             | 1.20±0.05           |             |
|            |            | 2 µM     | 257.00±4.83              | (-) 0.22    | 1.20±0.04           | (+) 0.42    |
|            |            | 4 µM     | 262.11±5.32              | (+) 1.77    | 1.18±0.04           | (-) 1.26    |
|            |            | 8 µM     | 259.56±4.03              | (+) 0.78    | 1.20±0.03           | 0           |
|            |            | 16 µM    | 259.33±2.44              | (+) 0.69    | 1.27±0.02           | (+) 6.28    |
|            |            | 32 µM    | 258.33±6.09              | (+) 0.30    | 1.20±0.04           | 0           |
|            |            | 64 µM    | 256.00±8.93              | (-) 0.61    | 1.19±0.03           | (-) 0.42    |
|            | NL5901     | EISO     | Control                  | 205.11±4.42 |                     | 1.19±0.03   |
| 3 µg/mL    |            |          | 200.11±4.09              | (-) 2.44    | 1.16±0.03           | (-) 2.94    |
| 6 µg/mL    |            |          | 206.33±7.01              | (+) 0.60    | 1.14±0.03           | (-) 4.62    |
| 12 µg/mL   |            |          | 231.22±4.49*             | (+) 12.73   | 1.16±0.04           | (-) 2.52    |
| 24 µg/mL   |            |          | 240.22±5.98**            | (+) 17.12   | 1.14±0.07           | (-) 3.87    |
| 48 µg/ml   |            |          | 212.78±6.91              | (+) 3.74    | 1.09±0.07           | (-) 8.49    |
| α-Santalol |            | Control  | 203.89±4.88              |             | 1.17±0.04           |             |
|            |            | 2 µM     | 208.33±4.63              | (+) 2.18    | 1.17±0.04           | (+) 0.43    |
|            |            | 4 µM     | 208.56±8.68              | (+) 2.29    | 1.16±0.03           | (-) 0.43    |
|            |            | 8 µM     | 209.78±6.86              | (+) 2.89    | 1.14±0.03           | (-) 2.15    |
|            |            | 16 µM    | 231.89±2.93*             | (+) 13.73   | 1.18±0.07           | (+) 1.20    |
|            |            | 32 µM    | 240.89±4.16**            | (+) 18.15   | 1.12±0.03           | (-) 3.86    |
|            |            | 64 µM    | 224.00±7.63              | (+) 9.86    | 1.19±0.05           | (+) 1.71    |
| β-Santalol |            | Control  | 209.00±4.99              |             | 1.12±0.03           |             |
|            |            | 2 µM     | 210.78±4.00              | (+) 0.85    | 1.14±0.04           | (+) 1.79    |
|            |            | 4 µM     | 209.56±6.21              | (+) 0.27    | 1.12±0.07           | (-) 0.09    |
|            |            | 8 µM     | 236.00±3.99*             | (+) 12.92   | 1.17±0.03           | (+) 4.46    |
|            |            | 16 µM    | 254.44±3.74**            | (+) 21.74   | 1.24±0.04           | (+) 10.27   |
|            |            | 32 µM    | 228.22±5.33              | (+) 9.20    | 1.11±0.03           | (-) 1.34    |
|            |            | 64 µM    | 229.56±3.97              | (+) 9.84    | 1.14±0.04           | (+) 1.79    |

**Table 3.** Effect of EISO,  $\alpha$ - and  $\beta$ -santalol on the reproduction and growth of wild type or NL5901 *C. elegans*. For reproduction assay, L1 stage N2 worms (30~35 worms/treatment) were raised on to NGM plates with and without EISO or santalol isomers for 72 h. Then, worms were individually shifted to fresh treatment plates each day until the reproduction period becomes ceased. Total eggs and offspring were counted at the L2/L3 stage. Growth was determined by measuring body length of the nematode of control and treated groups. L1 stage worms (30~40 worms/treatment) were treated with and without EISO or santalol isomers for 96 h. After exposure, day 1 worms subjected to analysis for body length measurement using Optika IsView image analyzing system. Data are presented as mean $\pm$ SEM of three independent runs, and analyzed by one way analysis of variance (ANOVA) followed by Bonferroni post-hoc test. Asterisks (\* and \*\*) indicate statistically significant difference ( $p < 0.05$  and  $p < 0.001$ ).

Table 4

| Treatment  |          | Mean survival (days±SEM) | % Change  | Maximum lifespan (days) | Sample Size (N) | Censored | <i>P</i> value |
|------------|----------|--------------------------|-----------|-------------------------|-----------------|----------|----------------|
| EISO       | Control  | 10.383±0.350             |           | 14                      | 99              | 9        |                |
|            | 3 µg/mL  | 10.089±0.361             | (-) 2.83  | 14                      | 93              | 10       | 0.8463         |
|            | 6 µg/mL  | 10.142±0.351             | (-) 2.32  | 15                      | 94              | 11       | 0.7075         |
|            | 12 µg/mL | 11.863±0.342             | (+)14.25  | 17                      | 105             | 8        | 0.0003         |
|            | 24 µg/mL | 13.491±0.361             | (+) 29.93 | 18                      | 94              | 8        | 0.0001         |
|            | 48 µg/ml | 9.950±0.323              | (-) 4.1   | 14                      | 93              | 9        | 0.1804         |
| α-Santalol | Control  | 10.253±0.320             |           | 14                      | 96              | 8        |                |
|            | 2 µM     | 10.080±0.335             | (-) 1.69  | 14                      | 88              | 3        | 0.6057         |
|            | 4 µM     | 10.121±0.342             | (-) 1.29  | 14                      | 88              | 6        | 0.8528         |
|            | 8 µM     | 10.502±0.326             | (+) 2.43  | 15                      | 90              | 5        | 0.8683         |
|            | 16 µM    | 10.751±0.315             | (+) 4.86  | 15                      | 98              | 5        | 0.2110         |
|            | 32 µM    | 12.532±0.359             | (+) 22.23 | 19                      | 102             | 0        | 0.0001         |
|            | 64 µM    | 10.967±0.360             | (+) 6.96  | 15                      | 95              | 2        | 0.1558         |
| β-Santalol | Control  | 10.922±0.329             |           | 15                      | 99              | 5        |                |
|            | 2 µM     | 10.366±0.340             | (-) 5.09  | 15                      | 97              | 6        | 0.3819         |
|            | 4 µM     | 10.259±0.339             | (-) 6.07  | 15                      | 91              | 4        | 0.0976         |
|            | 8 µM     | 11.308±0.342             | (+) 3.53  | 18                      | 112             | 8        | 0.1700         |
|            | 16 µM    | 14.086±0.408             | (+) 28.97 | 20                      | 94              | 0        | 0.0001         |
|            | 32 µM    | 10.846±0.408             | (-) 0.70  | 17                      | 104             | 2        | 0.7590         |
|            | 64 µM    | 10.867±0.309             | (-) 0.50  | 16                      | 105             | 2        | 0.9194         |

**Table 4.** Lifespan analysis of NL5901 *C. elegans* cultured at 20°C supplemented with various pharmacological doses of EISO, α- and β-santalol. The mean lifespan of NL5901 worms were calculated using Kaplan–Meir survival analysis and significance levels were estimated by long-rank test in Medcalc statistical tool.

Table 5

| Genotype                     | Treatment          | Mean survival (Mean±SEM) | Maximum lifespan (days) | Sample size (N) | Censored | % Change  | p value |
|------------------------------|--------------------|--------------------------|-------------------------|-----------------|----------|-----------|---------|
| Wild<br>(From late L4 stage) | EISO               |                          |                         |                 |          |           |         |
|                              | Control            | 15.305±0.423             | 23                      | 110             | 12       |           |         |
|                              | 3 µg/mL            | 15.449±0.454             | 24                      | 98              | 11       | (+) 0.94  | 0.7267  |
|                              | 6 µg/mL            | 16.620±0.502             | 25                      | 115             | 14       | (+) 8.59  | 0.0025  |
|                              | 12 µg/mL           | 17.922±0.593             | 28                      | 112             | 14       | (+) 17.10 | <0.0001 |
|                              | 24 µg/mL           | 19.339±0.586             | 31                      | 100             | 8        | (+) 26.36 | <0.0001 |
|                              | 48 µg/mL           | 15.951±0.528             | 24                      | 94              | 6        | (+) 4.22  | 0.9699  |
|                              | α-Santalol         |                          |                         |                 |          |           |         |
|                              | Control            | 15.486±0.449             | 24                      | 121             | 13       |           |         |
|                              | 4 µM               | 15.577±0.422             | 23                      | 118             | 8        | (+) 0.63  | 0.8914  |
|                              | 8 µM               | 15.878±0.475             | 23                      | 103             | 9        | (+) 2.57  | 0.6466  |
|                              | 16 µM              | 16.151±0.528             | 24                      | 119             | 10       | (+) 4.33  | 0.0901  |
|                              | 32 µM              | 17.076±0.478             | 26                      | 113             | 7        | (+) 10.31 | <0.0074 |
|                              | 64 µM              | 15.626±0.493             | 24                      | 120             | 11       | (+) 0.94  | 0.4619  |
|                              | β-Santalol         |                          |                         |                 |          |           |         |
|                              | Control            | 17.550±0.425             | 24                      | 130             | 14       |           |         |
|                              | 4 µM               | 17.071±0.470             | 24                      | 119             | 13       | (-) 2.73  | 0.4249  |
|                              | 8 µM               | 18.016±0.458             | 26                      | 129             | 14       | (+) 2.66  | 0.3892  |
|                              | 16 µM              | 19.754±0.515             | 30                      | 142             | 9        | (+) 12.56 | <0.0001 |
|                              | 32 µM              | 18.214±0.487             | 26                      | 123             | 7        | (+) 3.78  | 0.0975  |
|                              | 64 µM              | 18.364±0.511             | 26                      | 125             | 15       | (+) 4.64  | 0.0311  |
| Wild<br>(From embryo)        | Control            | 15.086±0.379             | 23                      | 114             | 10       |           |         |
|                              | EISO (24 µg/mL)    | 19.811±0.577             | 30                      | 125             | 8        | (+) 31.32 | <0.0001 |
|                              | α-Santalol (32 µM) | 17.807±0.513             | 26                      | 106             | 5        | (+) 18.04 | <0.0001 |
|                              | β-Santalol (16 µM) | 18.915±0.642             | 30                      | 113             | 9        | (+) 25.38 | <0.0001 |

**Table 5.** EISO and santalol isomers mediated longevity in wild-type *C. elegans*. Survival rate of wild-type *C. elegans* cultured on NGM plates supplemented with various pharmacological doses of EISO, α- and β-santalol at 20°C from late L4 stage or embryo. The mean lifespan of *C. elegans* were calculated using Kaplan–Meir survival analysis and significance levels were estimated by long-rank test in Medcalc statistical tool. For the analysis of statistical significance, treated groups were compared with control group.

Table 6

| Transgene         | Treatment                  | CED-1::GFP clusters around cell corpses |
|-------------------|----------------------------|-----------------------------------------|
| <i>ced-1::GFP</i> | Control                    | 0.44±0.08                               |
|                   | 6-OHDA                     | 3.42±0.27 #                             |
|                   | 6-OHDA/EGCG                | 1.24±0.15 **                            |
|                   | 6-OHDA/EISO                | 1.16±0.13 **                            |
|                   | 6-OHDA/ $\alpha$ -Santalol | 1.52±0.13 **                            |
|                   | 6-OHDA/ $\beta$ -Santalol  | 1.06±0.14 **                            |
|                   | EISO                       | 0.33±0.21                               |
|                   | $\alpha$ -Santalol         | 0.33±0.21                               |
|                   | $\beta$ -Santalol          | 0.17±0.17                               |

**Table 6.** Influences of EISO,  $\alpha$ - and  $\beta$ -santalol on CED-1::GFP expression in *C. elegans*. The 6-OHDA-induced elevation in clustering of CED-1::GFP around cell corpses was greatly attenuated with EISO,  $\alpha$ - and  $\beta$ -santalol treatment in MD701 *C. elegans*. Data were pooled from biological triplicates in experimental duplicates and presented as mean±SEM. A hash (#) mark indicates significant differences ( $p<0.001$ ) between 6-OHDA exposed and unexposed (control) worms, an asterisk (\*\*) indicate significant difference between 6-OHDA exposed and 6-OHDA/EGCG, EISO,  $\alpha$ - or  $\beta$ -santalol treated groups ( $p<0.001$ ).

Table 7

| Genotype      | Treatment                  | Mean survival (Mean±SEM) | Maximum lifespan (days) | Sample size (N) | Censored | % Change  | p value |
|---------------|----------------------------|--------------------------|-------------------------|-----------------|----------|-----------|---------|
| <i>daf-16</i> | Control                    | 15.230±0.429             | 21                      | 100             | 9        |           |         |
|               | 6-OHDA                     | 12.468±0.418             | 18                      | 84              | 6        | (-) 18.14 | <0.0001 |
|               | 6-OHDA/EISO                | 16.257±0.482             | 24                      | 104             | 5        | (+) 30.39 | <0.0001 |
|               | 6-OHDA/ $\alpha$ -Santalol | 15.300±0.466             | 24                      | 106             | 8        | (+) 22.71 | <0.0001 |
|               | 6-OHDA/ $\beta$ -Santalol  | 17.382±0.482             | 25                      | 100             | 8        | (+) 39.41 | <0.0001 |
| <i>daf-2</i>  | Control                    | 27.815±0.834             | 46                      | 122             | 11       |           |         |
|               | 6-OHDA                     | 25.229±0.820             | 40                      | 113             | 8        | (-) 9.30  | 0.0199  |
|               | 6-OHDA/EISO                | 32.049±0.973             | 50                      | 117             | 10       | (+) 27.03 | <0.0001 |
|               | 6-OHDA/ $\alpha$ -Santalol | 30.886±0.898             | 47                      | 114             | 6        | (+) 22.42 | <0.0001 |
|               | 6-OHDA/ $\beta$ -Santalol  | 34.426±1.021             | 54                      | 119             | 9        | (+) 36.45 | <0.0001 |
| <i>akt-1</i>  | Control                    | 23.032±0.705             | 32                      | 89              | 9        |           |         |
|               | 6-OHDA                     | 20.567±0.622             | 27                      | 80              | 2        | (-) 10.70 | <0.0001 |
|               | 6-OHDA/EISO                | 19.635±0.645             | 29                      | 84              | 8        | (-) 4.53  | 0.3276  |
|               | 6-OHDA/ $\alpha$ -Santalol | 18.876±0.592             | 28                      | 101             | 10       | (-) 8.22  | 0.6825  |
|               | 6-OHDA/ $\beta$ -Santalol  | 20.302±0.747             | 29                      | 84              | 4        | (-) 1.29  | 0.2410  |
| <i>mev-1</i>  | Control                    | 9.77±0.272               | 14                      | 76              | 4        |           |         |
|               | 6-OHDA                     | 7.440±0.255              | 10                      | 70              | 7        | (-) 23.85 | <0.0001 |
|               | 6-OHDA/EISO                | 11.194±0.292             | 17                      | 72              | 1        | (+) 50.46 | <0.0001 |
|               | 6-OHDA/ $\alpha$ -Santalol | 10.323±0.325             | 16                      | 74              | 5        | (+) 38.75 | <0.0001 |
|               | 6-OHDA/ $\beta$ -Santalol  | 10.268±0.161             | 18                      | 80              | 5        | (+) 38.01 | <0.0001 |
| <i>isp-1</i>  | Control                    | 20.733±0.660             | 32                      | 85              | 6        |           |         |
|               | 6-OHDA                     | 17.425±0.507             | 22                      | 66              | 10       | (-) 15.96 | <0.0001 |
|               | 6-OHDA/EISO                | 24.638±0.715             | 35                      | 99              | 9        | (+) 41.39 | <0.0001 |
|               | 6-OHDA/ $\alpha$ -Santalol | 22.724±0.778             | 35                      | 89              | 6        | (+) 30.41 | <0.0001 |
|               | 6-OHDA/ $\beta$ -Santalol  | 25.702±0.788             | 36                      | 91              | 8        | (+) 47.50 | <0.0001 |
| <i>clk-1</i>  | Control                    | 21.244±0.626             | 28                      | 69              | 7        |           |         |
|               | 6-OHDA                     | 14.144±0.572             | 22                      | 63              | 7        | (-) 33.24 | <0.0001 |
|               | 6-OHDA/EISO                | 15.179±0.570             | 21                      | 52              | 4        | (+) 7.32  | 0.3911  |
|               | 6-OHDA/ $\alpha$ -Santalol | 14.822±0.644             | 20                      | 46              | 5        | (+) 4.79  | 0.5101  |
|               | 6-OHDA/ $\beta$ -Santalol  | 15.596±0.324             | 21                      | 51              | 3        | (+) 10.27 | 0.2443  |
| <i>lin-45</i> | Control                    | 13.086±0.409             | 17                      | 65              | 4        |           |         |
|               | 6-OHDA                     | 11.389±0.388             | 15                      | 60              | 5        | (-) 12.97 | <0.0001 |
|               | 6-OHDA/EISO                | 11.327±0.335             | 15                      | 68              | 7        | (-) 0.54  | 0.6423  |
|               | 6-OHDA/ $\alpha$ -Santalol | 10.699±0.310             | 15                      | 72              | 0        | (-) 6.06  | 0.6556  |
|               | 6-OHDA/ $\beta$ -Santalol  | 11.533±0.170             | 14                      | 64              | 7        | (+) 1.26  | 0.0178  |
| <i>mek-2</i>  | Control                    | 8.234±0.302              | 12                      | 61              | 5        |           |         |
|               | 6-OHDA                     | 7.143±0.231              | 9                       | 49              | 2        | (-) 13.25 | <0.0001 |
|               | 6-OHDA/EISO                | 7.707±0.214              | 10                      | 56              | 6        | (+) 7.90  | 0.0469  |
|               | 6-OHDA/ $\alpha$ -Santalol | 7.182±0.226              | 10                      | 63              | 5        | (+) 0.55  | 0.6810  |
|               | 6-OHDA/ $\beta$ -Santalol  | 6.932±0.211              | 9                       | 59              | 3        | (-) 2.95  | 0.4600  |
| <i>mpk-1</i>  | Control                    | 13.832±0.429             | 22                      | 116             | 9        |           |         |
|               | 6-OHDA                     | 11.443±0.312             | 18                      | 87              | 7        | (-) 17.27 | <0.0001 |
|               | 6-OHDA/EISO                | 11.929±0.348             | 19                      | 103             | 10       | (+) 4.25  | 0.1164  |
|               | 6-OHDA/ $\alpha$ -Santalol | 11.977±0.369             | 18                      | 107             | 9        | (+) 4.67  | 0.0854  |



|               |                            |                    |    |     |   |           |         |
|---------------|----------------------------|--------------------|----|-----|---|-----------|---------|
|               | 6-OHDA/ $\beta$ -Santalol  | 11.459 $\pm$ 0.293 | 19 | 98  | 8 | (+) 0.14  | 0.9061  |
| <i>skn-1</i>  | Control                    | 15.635 $\pm$ 0.348 | 19 | 62  | 3 |           |         |
|               | 6-OHDA                     | 12.333 $\pm$ 0.289 | 16 | 65  | 4 | (-) 21.12 | <0.0001 |
|               | 6-OHDA/EISO                | 11.683 $\pm$ 0.224 | 15 | 63  | 0 | (-) 5.27  | 0.0097  |
|               | 6-OHDA/ $\alpha$ -Santalol | 11.771 $\pm$ 0.283 | 15 | 66  | 4 | (-) 4.56  | 0.1591  |
|               | 6-OHDA/ $\beta$ -Santalol  | 12.268 $\pm$ 0.344 | 16 | 65  | 5 | (-) 0.53  | 0.9686  |
| <i>wdr-23</i> | Control                    | 22.491 $\pm$ 0.595 | 32 | 95  | 7 |           |         |
|               | 6-OHDA                     | 22.702 $\pm$ 0.580 | 32 | 86  | 5 | (+) 0.94  | 0.7979  |
|               | 6-OHDA/EISO                | 21.878 $\pm$ 0.581 | 31 | 81  | 4 | (-) 3.63  | 0.2867  |
|               | 6-OHDA/ $\alpha$ -Santalol | 22.078 $\pm$ 0.531 | 31 | 107 | 8 | (-) 2.75  | 0.3084  |
|               | 6-OHDA/ $\beta$ -Santalol  | 23.126 $\pm$ 0.509 | 32 | 99  | 8 | (+) 1.87  | 0.7585  |

**Table 7.** Genetic requirement for EISO,  $\alpha$ - and  $\beta$ -santalol-mediated geroprotection against 6-OHDA-induced toxicity in *C. elegans*. The mean lifespan of *C. elegans* mutants were calculated using Kaplan–Meir survival analysis and significance levels were estimated by long-rank test in Medcalc statistical tool. For the analysis of statistical significance, 6-OHDA alone treated group was compared with untreated control, and 6-OHDA/EISO,  $\alpha$ - or  $\beta$ -santalol treated groups were compared with 6-OHDA alone treated group.

**Table 8**

| Compound           | donorHB <sup>1</sup> | acceptHB <sup>2</sup> | QPPCaco <sup>3</sup> | QPlogBB <sup>4</sup> | QPPMDCK <sup>5</sup> | QPlogKp <sup>6</sup> |
|--------------------|----------------------|-----------------------|----------------------|----------------------|----------------------|----------------------|
| Acceptable range   | 0.0 to 6.0           | 2.0 to 20.0           | <25 poor, >500 great | -3 to -1.2           | <25 poor, >500 great | -8 to -1             |
| $\alpha$ -Santalol | 1                    | 1.70                  | 3943.57              | -0.088               | 2179.9               | -1.775               |
| $\beta$ -santalol  | 1                    | 1.70                  | 3371.88              | -0.158               | 1840.421             | -1.819               |

| Compound           | QPlogKhsa <sup>7</sup> | % Human oral absorption <sup>8</sup> | Human oral absorption <sup>9</sup> | Lipinski's rule of five <sup>10</sup> |
|--------------------|------------------------|--------------------------------------|------------------------------------|---------------------------------------|
| Acceptable range   | -1.5 to 1.5            | >80% is high <25% is poor            | 1-low, 2-medium, 3-high            | < 5                                   |
| $\alpha$ -Santalol | 0.365                  | 100                                  | 3                                  | 0                                     |
| $\beta$ -santalol  | 0.404                  | 100                                  | 3                                  | 0                                     |

**Table 8.** Predicted ADME properties of santalol isomers using QikProp module.

<sup>1</sup>Estimated number of hydrogen bonds that would be donated by the solute to water molecules in an aqueous solution

<sup>2</sup>Estimated number of hydrogen bonds that would be accepted by the solute from water molecules in an aqueous solution

<sup>3</sup>Predicted apparent Caco-2 cell permeability in nm/sec

<sup>4</sup>Predicted brain/blood partition coefficient

<sup>5</sup>Predicted apparent MDCK cell permeability in nm/sec

<sup>6</sup>Predicted skin permeability, log Kp

<sup>7</sup>Prediction of binding to human serum albumin

<sup>8</sup>Predicted human oral absorption on 0 to 100% scale

<sup>9</sup>Predicted qualitative human oral absorption

<sup>10</sup>Number of violations of Lipinski's rule of five

Figure 1

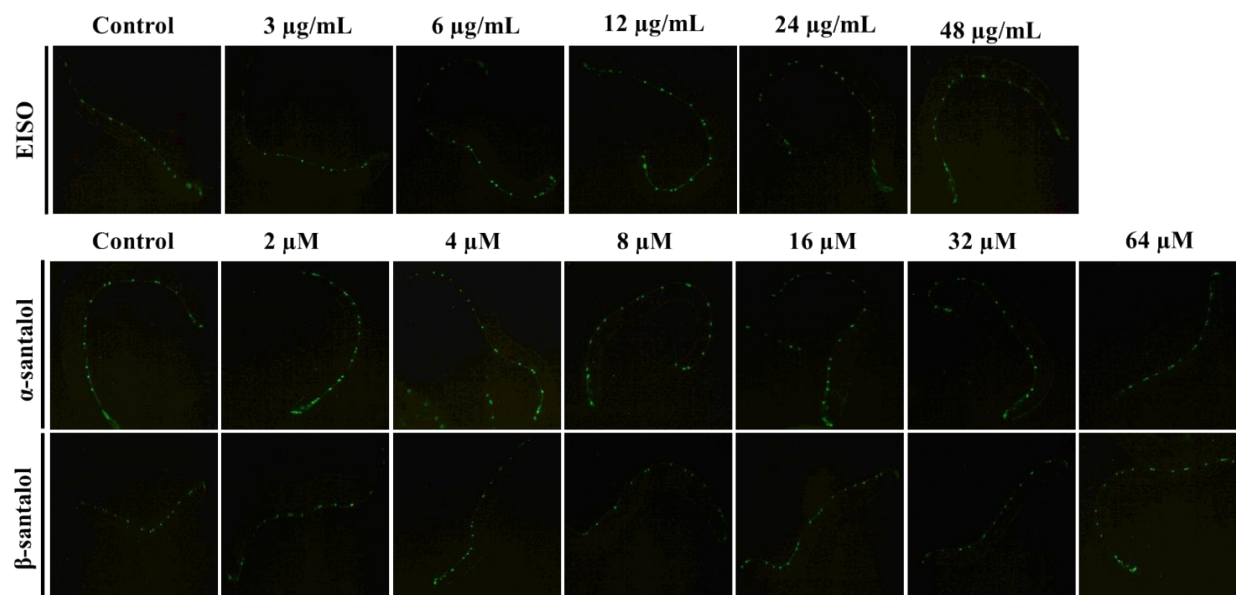

**Fig. 1.** Effect of EISO,  $\alpha$ - and  $\beta$ -santalol on the development and morphology of D-type GABAergic motor neurons. Exposure was performed from L1 stage to adult stage.

Figure 2

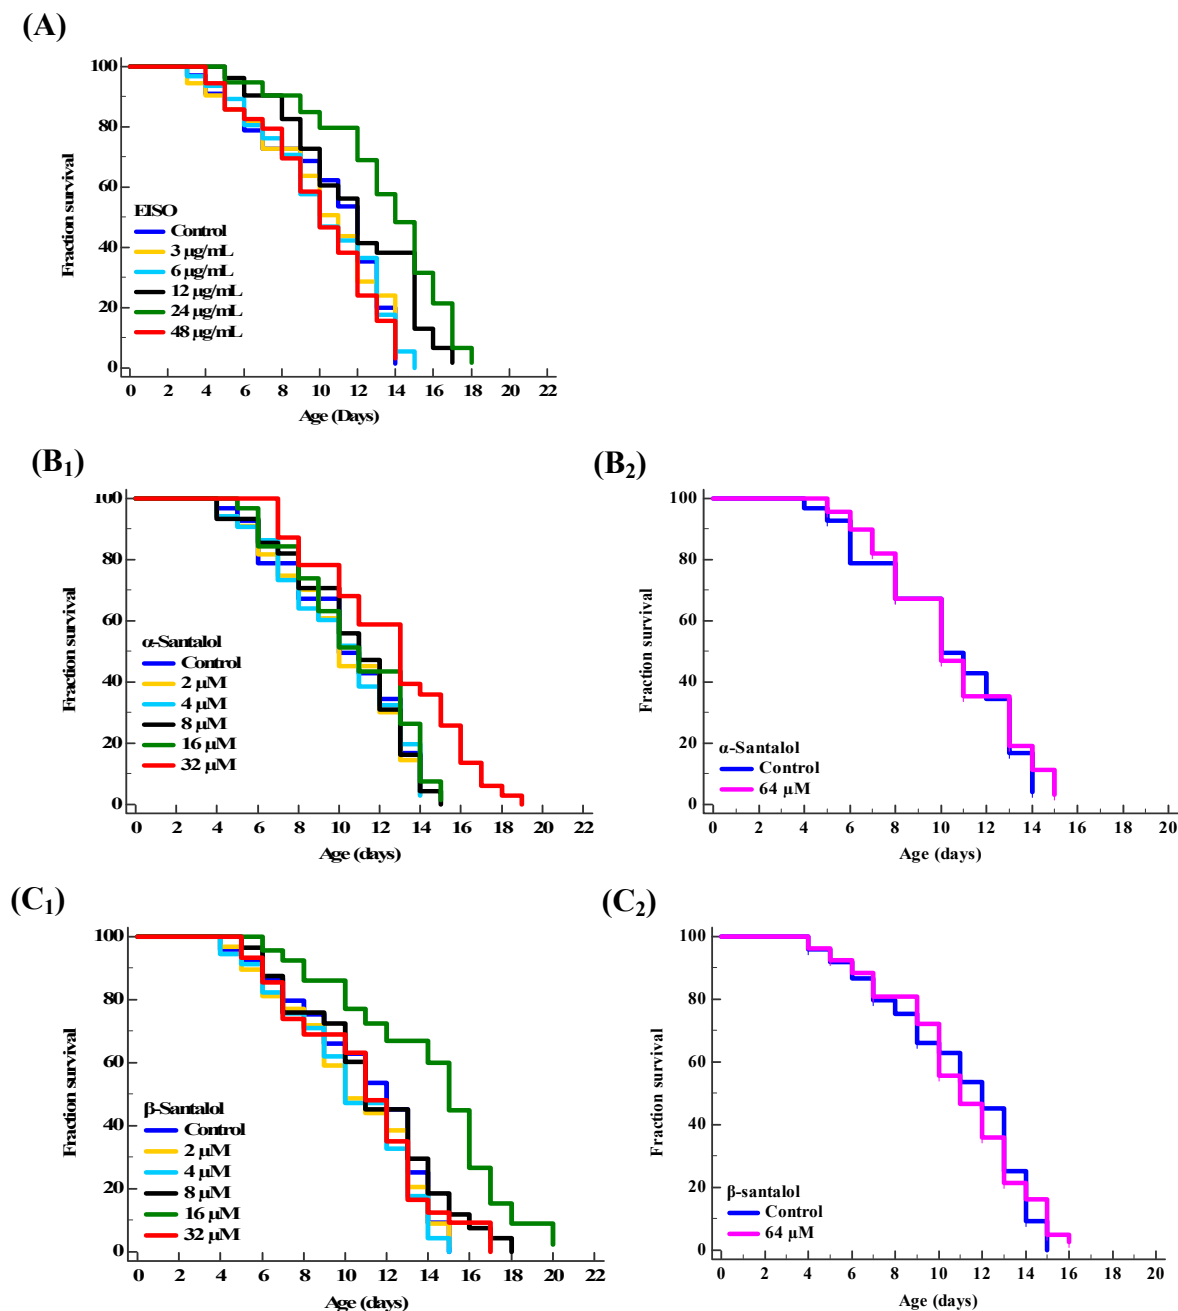

**Fig. 2.** Beneficial effect of EISO and its principal components on the lifespan of NL5901 *C. elegans*. The survival graphs showed the effect of dietary supplemented (A) EISO (B1-2)  $\alpha$ -santalol and (C1-2)  $\beta$ -santalol on the lifespan of transgenic *C. elegans* strain NL5901 constitutively express human  $\alpha$ -synuclein (a Parkinson's related protein) in body wall muscles. The survival curves were plotted using Kaplan-Meier survival analysis and significance levels were estimated by long-rank test in Medcalc statistical software v.14. The representative Kaplan-Meier survival curves from three independent runs were presented.

Figure 3

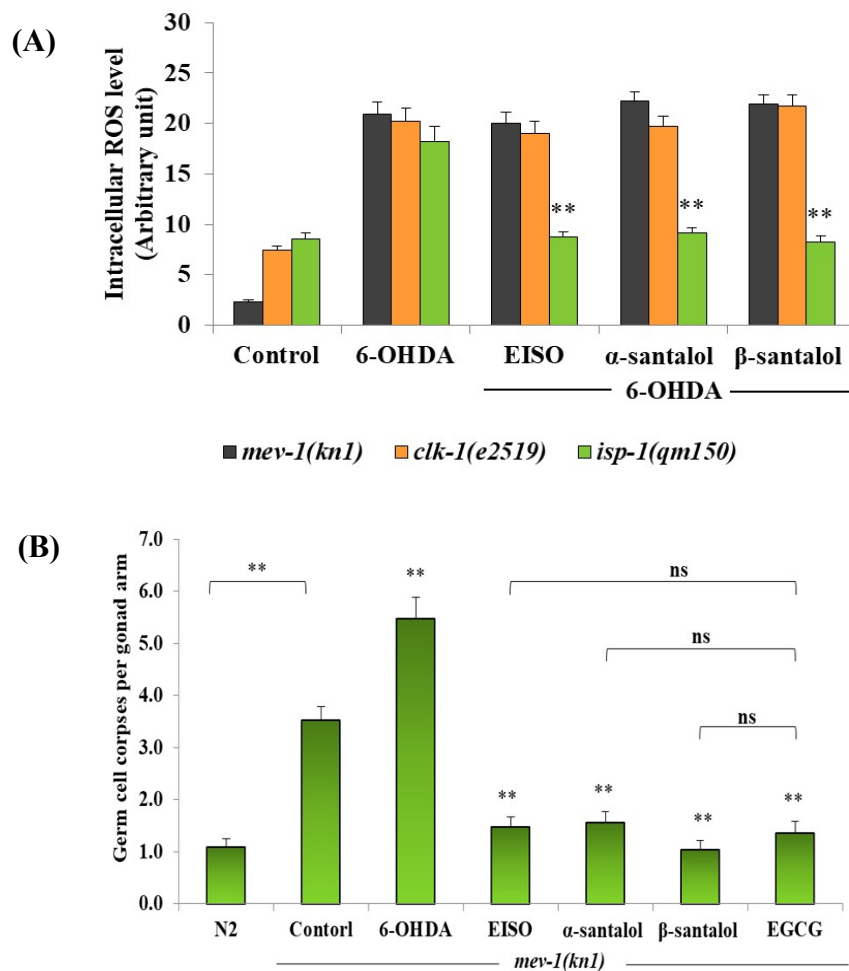

**Fig. 3.** Histogram represents the changes in (A) intracellular ROS level and (B) germ cell death/apoptosis in mitochondrial ETC pathway mutants treated with 6-OHDA and 6-OHDA/EISO,  $\alpha$ - or  $\beta$ -santalol. Data pooled from three independent biological experiments with appropriate replicates. Probability levels of  $p < 0.05$  were considered as statistically significant. \*\* $p < 0.01$ , <sup>ns</sup>not significant.

Figure 4

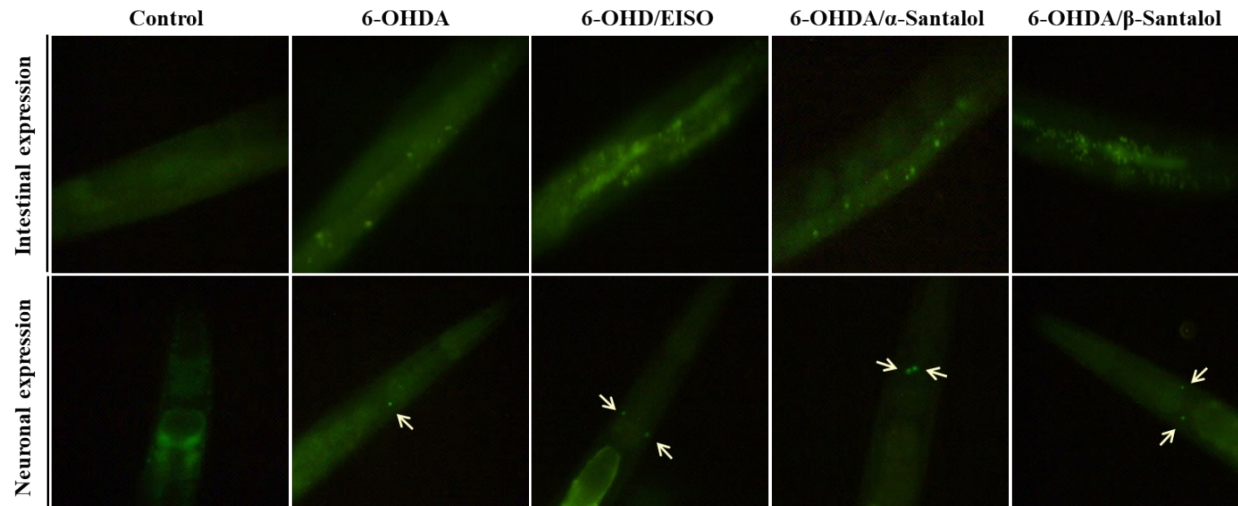

**Fig. 4.** Effect of EISO,  $\alpha$ - and  $\beta$ -santalol on the expression of *skn-1::gfp* transgene in LD1 *C. elegans*. Intestinal and ASI neuronal expression of *skn-1 b/c::GFP* was observed in adult *C. elegans* after treated with 6-OHDA and 6-OHDA/EISO,  $\alpha$ - or  $\beta$ -santalol. *skn-1 b/c::GFP* were visualized in under fluorescence microscope and classified into low, medium and high based on expression pattern (see **Fig. 16** in main article). Expression of *skn-1 b/c::GFP* in ASI neurons are indicated by white arrow(s).

Figure 5

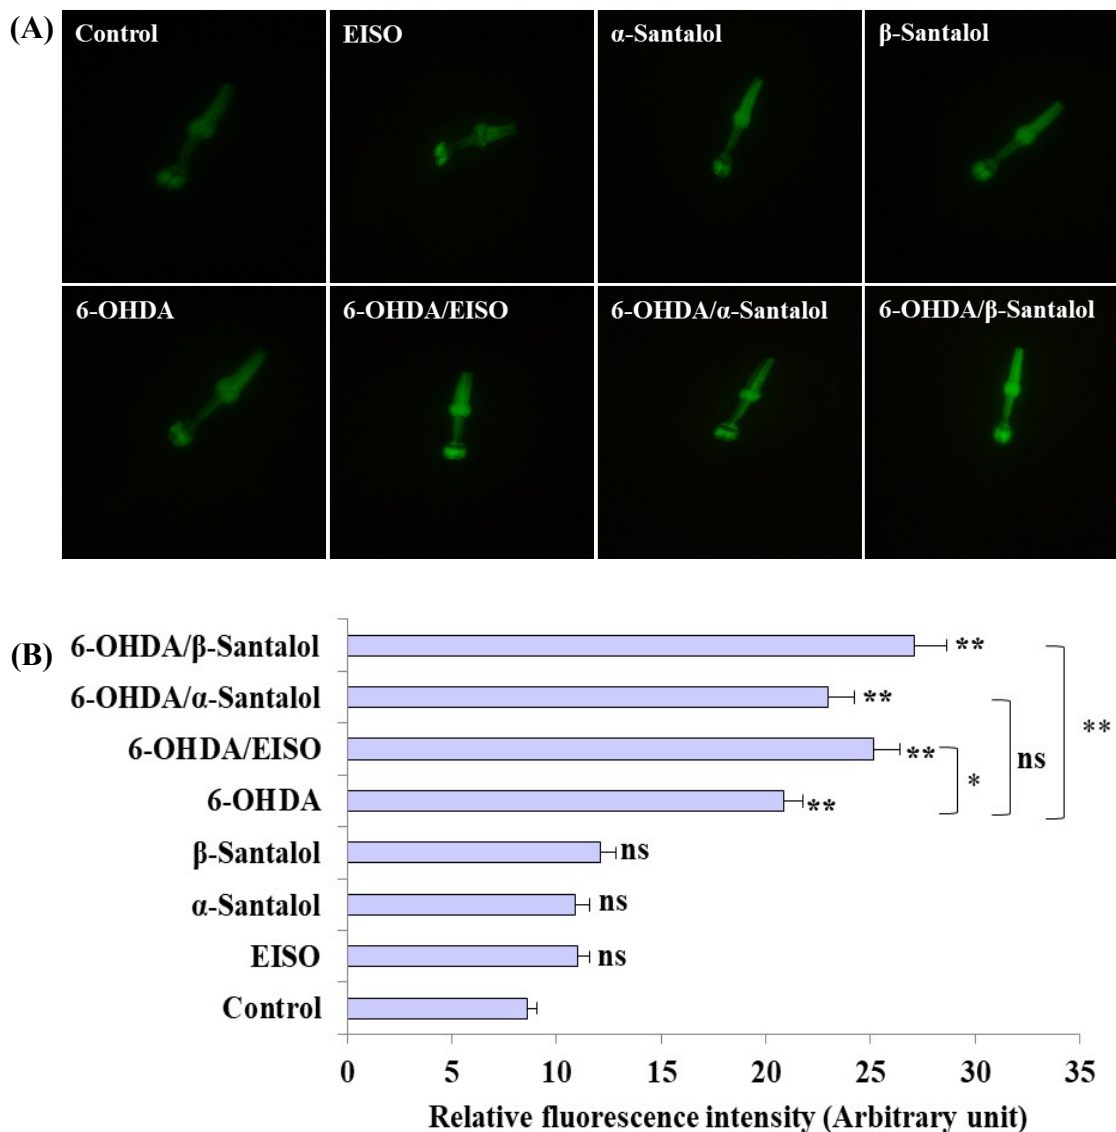

**Fig. 5.** (A) Relative expression of *ctl-1,2,3p::GFP* transgene in GA800 *C. elegans* treated with 6-OHDA, EISO,  $\alpha$ -santalol,  $\beta$ -santalol and 6-OHDA/EISO,  $\alpha$ - or  $\beta$ -santalol at 20°C. (B) Histogram represents the changes in expression across various treatments. Data shown here are mean $\pm$ SEM, the probability levels of  $p<0.05$  were considered as statistically significant. \* $p<0.05$ , \*\* $p<0.01$  and <sup>ns</sup>not significant.

Figure 6

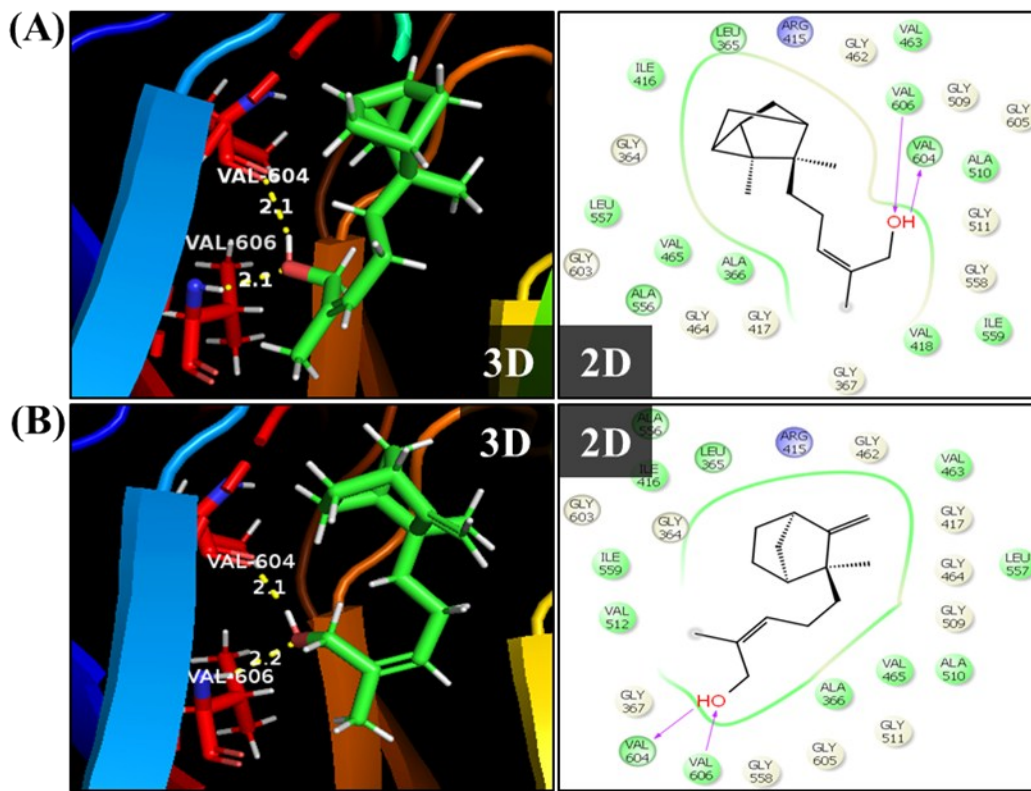

**Fig. 6.** Proposed interaction of (A)  $\alpha$ -santalol and (B)  $\beta$ -santalol on the binding cleft of Keap1 domain of Keap1. The representative three-dimensional and two-dimensional interaction map shows the binding mode of  $\alpha$ - and  $\beta$ -santalol (stick style in a green color) through hydrogen bonds (yellow dashed lines) with Keap1 (shown in ribbon style and colored shape). The pink arrow in two-dimensional image indicates potential interactions between amino acid residues and  $\alpha$ - or  $\beta$ -santalol.



Figure 7

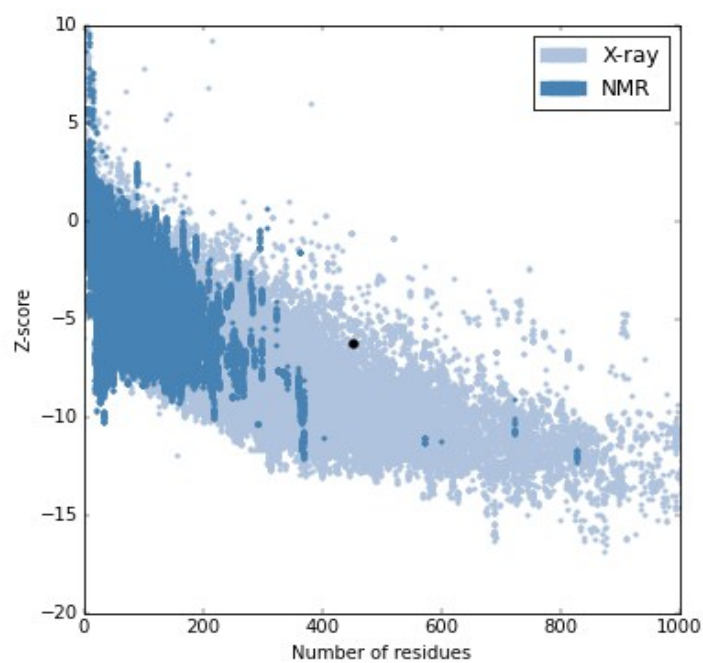

**Fig. 7.** Investigation of the modeled WDR-23 protein structure. The Z-score (black dot) of this model is -6.22 which is closer to the experimentally resolved X-ray and NMR structures.

Figure 8A

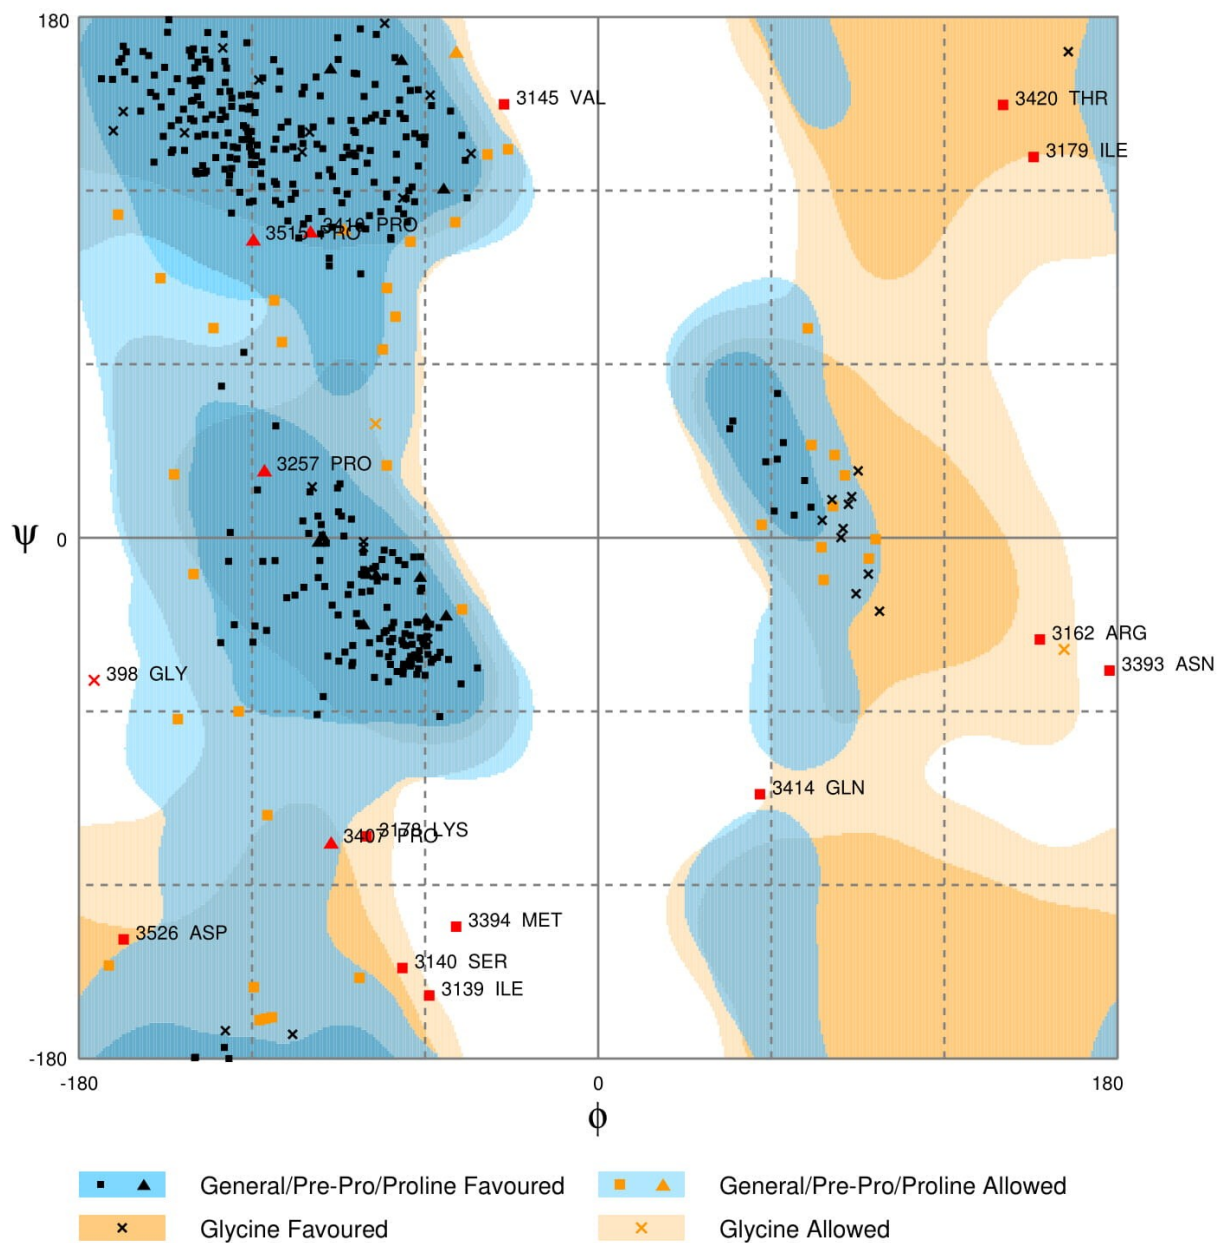

|                                                         |               |
|---------------------------------------------------------|---------------|
| Number of residues in favoured region (~98.0% expected) | : 397 (87.8%) |
| Number of residues in allowed region (~2.0% expected)   | : 39 (8.6%)   |
| Number of residues in outlier region                    | : 16 (3.5%)   |

Figure 8B

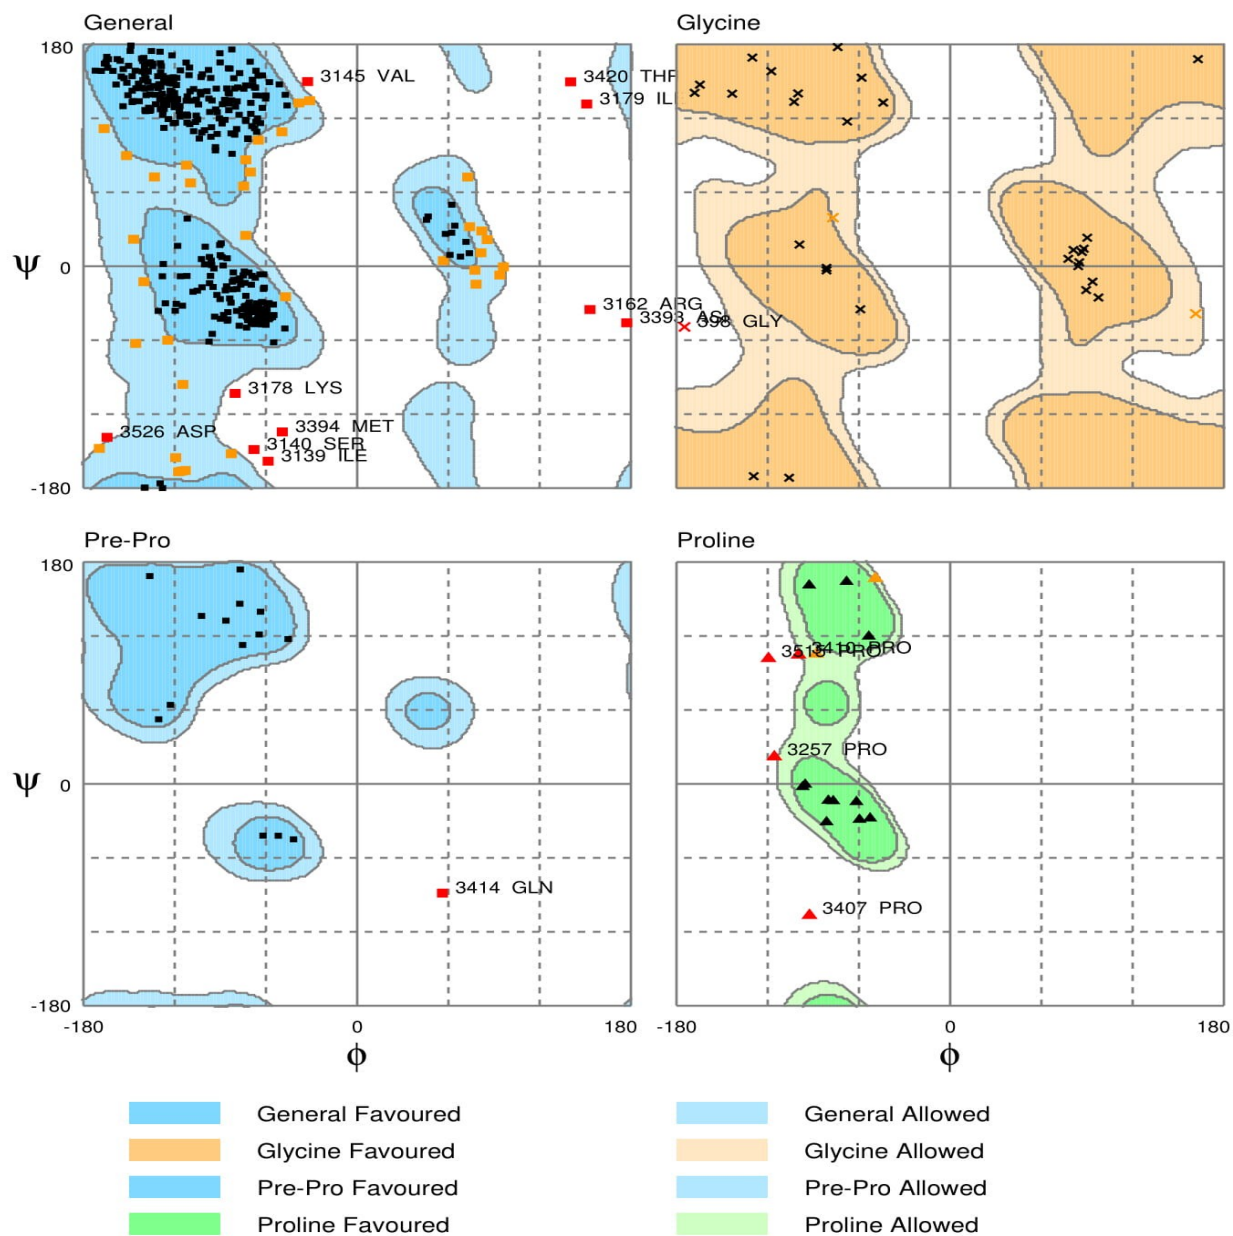

|                                                         |               |
|---------------------------------------------------------|---------------|
| Number of residues in favoured region (~98.0% expected) | : 397 (87.8%) |
| Number of residues in allowed region (~2.0% expected)   | : 39 (8.6%)   |
| Number of residues in outlier region                    | : 16 (3.5%)   |

Fig. 8. (A, B) Ramachandran plot of modeled WDR-23 protein.

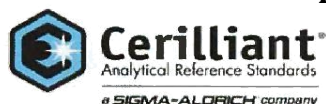Figure 9. Certificate of analysis ( $\alpha$ -Santalol)

CSQ-15208  
AV12066  
Revision 0  
Page 1 of 9

# Certificate of Analysis

|                    |
|--------------------|
| Cerilliant Quality |
| ISO GUIDE 34       |
| ISO/IEC 17025      |
| ISO 13485          |
| ISO 9001           |
| GMP/GLP            |

## cis- $\alpha$ -Santalol

(2Z)-5-[(3R)-2,3-dimethyltricyclo[2.2.1.0<sup>2,6</sup>]hept-3-yl]-2-methylpent-2-en-1-ol

**Reference Number:** CSQ-15208  
**Lot Number:** AV12066  
**Retest Date:** June 2013  
**CAS Number:** 115-71-9  
**Chemical Formula:** C<sub>15</sub>H<sub>24</sub>O  
**Molecular Weight:** 220.35  
**Chromatographic Purity:** 98.2%  
**Purity Factor<sup>1</sup>:** 96.8%  
**Storage:** Refrigerate.  
**Handling:** As specified in the manufacturer MSDS.  
**Intended Use:** For R&D/ analytical purposes only.

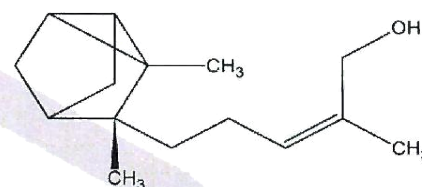

<sup>1</sup> Purity Factor = (100 - wt% residual solvent - wt% residual water) x Chromatographic Purity/100

### Spectral and Physical Data

| Analytical Test                           | Method               | Results                   |
|-------------------------------------------|----------------------|---------------------------|
| Appearance                                | Visual Inspection    | Clear oil                 |
| Chromatographic Purity by GC/FID Analysis | SP10-0101            | 98.2% <sup>2</sup>        |
| Identity by LC/MS Analysis                | SP10-0107            | Consistent with Structure |
| Identity by FTIR Analysis                 | SP10-0108            | Consistent with Structure |
| Identity by <sup>1</sup> H-NMR Analysis   | USP <761>, SP10-0116 | Consistent with Structure |
| Identity by <sup>13</sup> C-NMR Analysis  | USP <761>, SP10-0116 | Consistent with Structure |
| Identity by 2D-NMR Analysis               | USP <761>, SP10-0116 | Consistent with Structure |

<sup>2</sup> Purity value is the average of two independent analyses.

Cerilliant certifies the analyses detailed in this certificate are true and accurate. Retest date assigned at the request of the Customer. Cerilliant has not collected stability and makes no claims or warranty regarding shelf life or stability of material.

Authorized Signature:

*Lara Sparks*

Lara Sparks, Quality Assurance Director

July 16, 2012

Date

CSQ-15208  
 AV12066  
 Revision 0  
 Page 2 of 9

**Spectral and Physical Data (cont.)**

| Analytical Test                                    | Method               | Results                                           |            |          |
|----------------------------------------------------|----------------------|---------------------------------------------------|------------|----------|
| Residual Solvent Analysis by GC/FID Headspace      | AM1087 <sup>3</sup>  | 1.22%                                             |            |          |
| Residual Water Analysis by Karl Fischer Coulometry | USP <921>, SP10-0103 | 0.21%                                             |            |          |
| Specific Rotation                                  | SP10-0133            | [ $\alpha$ ] <sub>D</sub> <sup>20</sup> = 21.004° |            |          |
| Elemental Analysis                                 | SP10-0117            |                                                   | Calculated | Analyzed |
|                                                    |                      | C                                                 | 81.12%     | 80.92%   |
|                                                    |                      | H                                                 | 11.00%     | 10.83%   |
|                                                    |                      | O                                                 | 7.89%      | 7.33%    |
| Inorganic Content by ICP                           | Outsourced           | Refer to results on page 7                        |            |          |
| Thermogravimetric Analysis                         | SP10-0136            | 2.31%                                             |            |          |
| Refractive Index Analysis                          | Outsourced           | 1.4965 at 25 °C                                   |            |          |

<sup>3</sup> Validated analytical method

CSQ-15208

AV12066

Revision 0

Page 3 of 9

*Spectral and Physical Data (cont.)*

## GC/FID

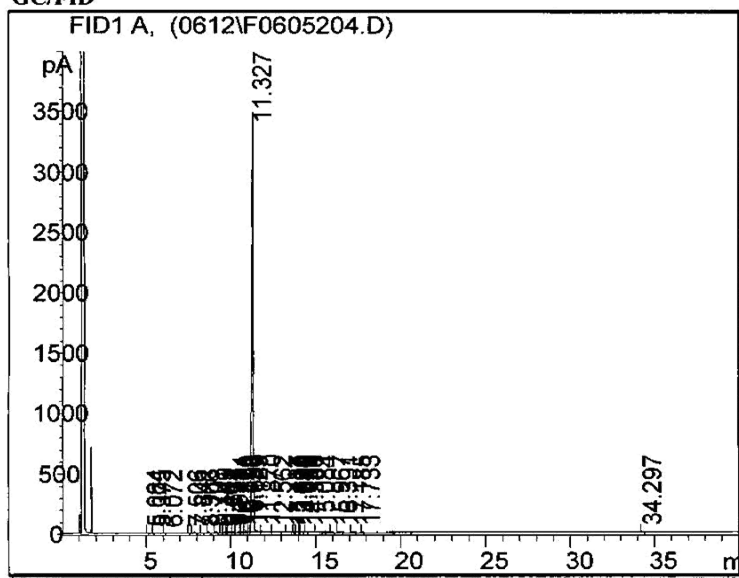

Column: DB-5ms, 30 m x 0.53 mm ID, 1.5 µm film thickness

Temp Program: 40°C to 160°C at 40°C/min

160°C to 210°C at 2°C/min

210°C to 280°C at 10°C/min (hold 5 min)

Injector Temp: Cool-on-Column

Detector Temp: 325°C

Data File Name: S:\GC\GC6\2012\0612\F0605204.D

Operator: RPC

Instrument: GC#6

Sample Name: AV12066

Method File: CISSANTA.M

Acquired: June 5, 2012 11:48 AM

| Peak # | Ret Time | Area  | Height | Area % | Peak # | Ret Time | Area     | Height  | Area % |
|--------|----------|-------|--------|--------|--------|----------|----------|---------|--------|
| 1      | 5.06     | 0.30  | 0.12   | 0.00   | 18     | 11.13    | 4.97     | 1.06    | 0.02   |
| 2      | 5.38     | 0.74  | 0.32   | 0.00   | 19     | 11.33    | 19935.90 | 3472.82 | 98.29  |
| 3      | 6.07     | 0.89  | 0.26   | 0.00   | 20     | 11.87    | 140.45   | 9.40    | 0.69   |
| 4      | 7.51     | 0.38  | 0.11   | 0.00   | 21     | 12.56    | 26.65    | 1.95    | 0.13   |
| 5      | 7.84     | 12.92 | 3.00   | 0.06   | 22     | 13.44    | 3.33     | 0.35    | 0.02   |
| 6      | 8.31     | 0.60  | 0.15   | 0.00   | 23     | 13.69    | 0.18     | 0.05    | 0.00   |
| 7      | 8.71     | 2.76  | 0.65   | 0.01   | 24     | 13.79    | 0.39     | 0.09    | 0.00   |
| 8      | 9.15     | 7.25  | 1.49   | 0.04   | 25     | 13.85    | 0.77     | 0.12    | 0.00   |
| 9      | 9.46     | 0.61  | 0.15   | 0.00   | 26     | 14.01    | 0.18     | 0.07    | 0.00   |
| 10     | 9.61     | 7.93  | 1.60   | 0.04   | 27     | 14.05    | 0.35     | 0.09    | 0.00   |
| 11     | 9.75     | 2.33  | 0.44   | 0.01   | 28     | 14.39    | 0.35     | 0.05    | 0.00   |
| 12     | 9.97     | 6.88  | 1.07   | 0.03   | 29     | 15.08    | 4.89     | 0.69    | 0.02   |
| 13     | 10.18    | 2.46  | 0.46   | 0.01   | 30     | 15.97    | 4.54     | 0.65    | 0.02   |
| 14     | 10.50    | 2.91  | 0.37   | 0.01   | 31     | 16.39    | 7.28     | 0.99    | 0.04   |
| 15     | 10.58    | 1.19  | 0.30   | 0.01   | 32     | 17.19    | 1.75     | 0.17    | 0.01   |
| 16     | 10.73    | 2.05  | 0.46   | 0.01   | 33     | 17.73    | 0.66     | 0.14    | 0.00   |
| 17     | 10.90    | 93.63 | 16.52  | 0.46   | 34     | 34.30    | 3.84     | 1.08    | 0.02   |



CSQ-15208  
AV12066  
Revision 0  
Page 4 of 9

*Spectral and Physical Data (cont.)*

**Identity by FTIR Analysis**

**Instrument:** Perkin Elmer Spectrum One  
**Matrix:** Neat  
**Scans:** 32

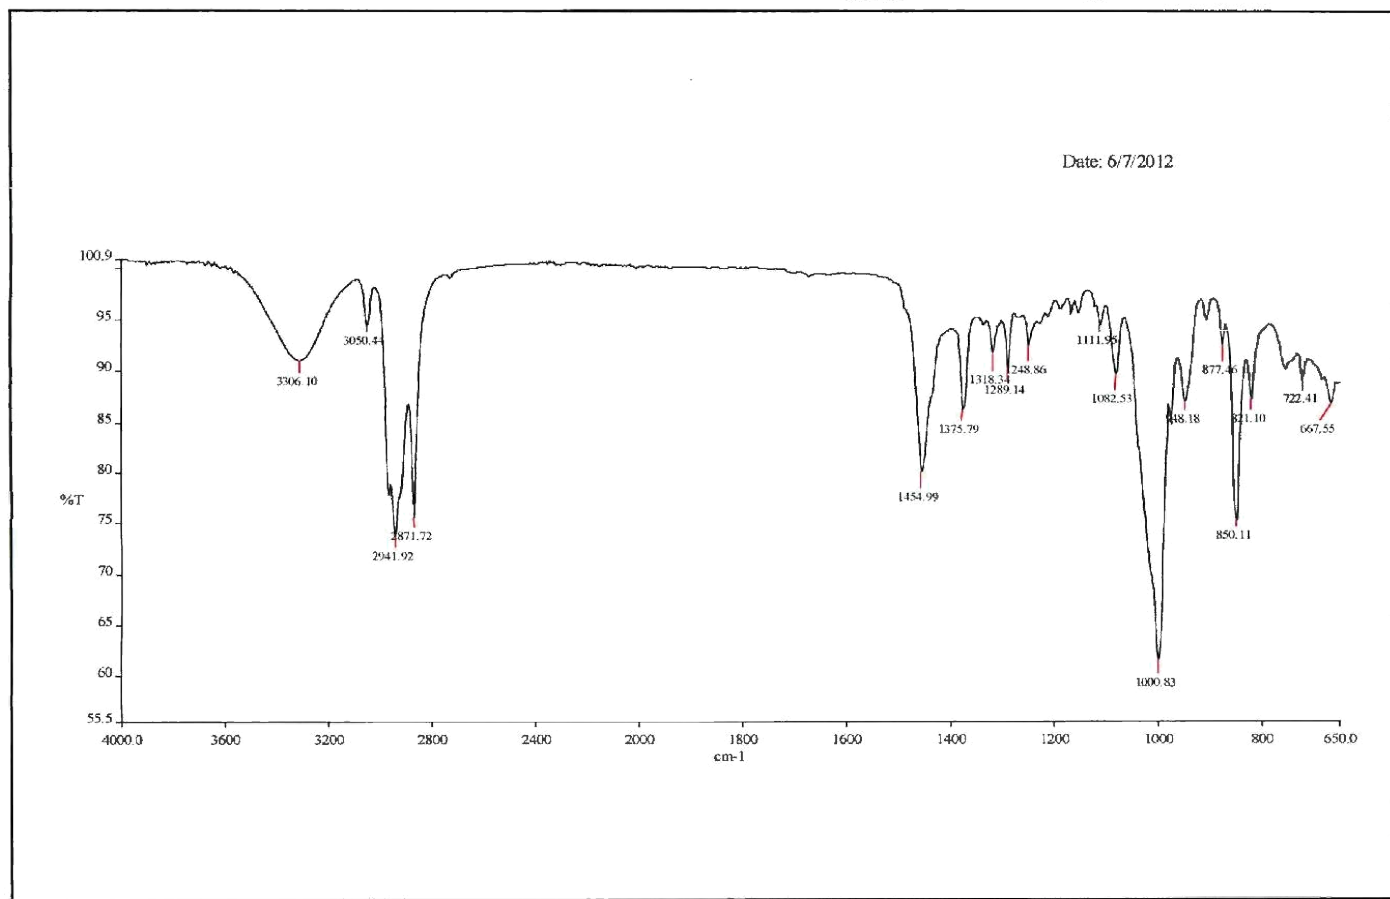





CSQ-15208  
AV12066  
Revision 0  
Page 6 of 9

*Spectral and Physical Data (cont.)*

2D NMR

Instrument: JEOL ECS 400

Solvent: Chloroform-D

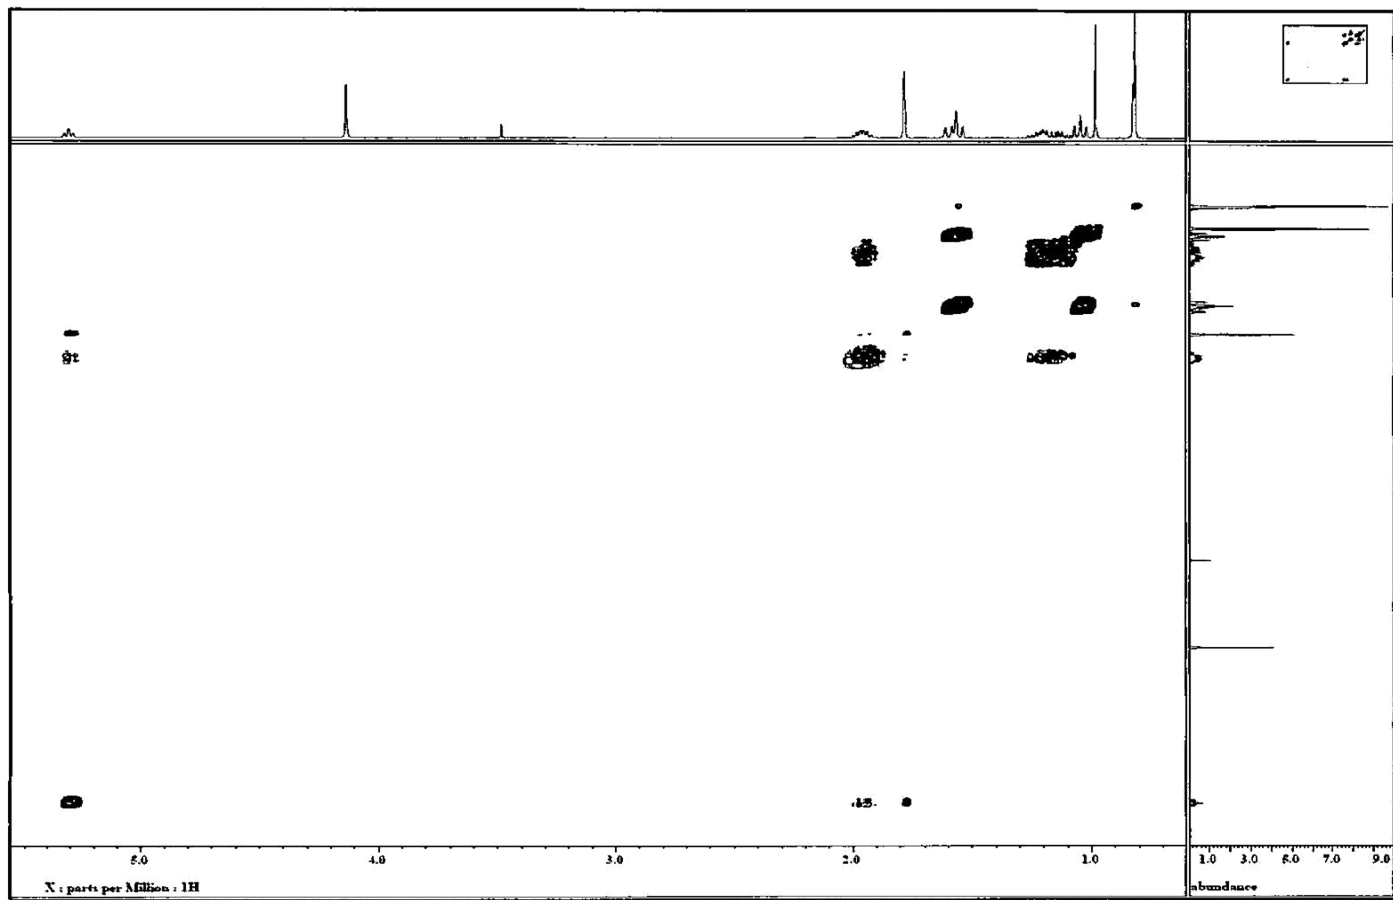

## Spectral and Physical Data (cont.)

## Residual Solvent Analysis by GC/FID Headspace

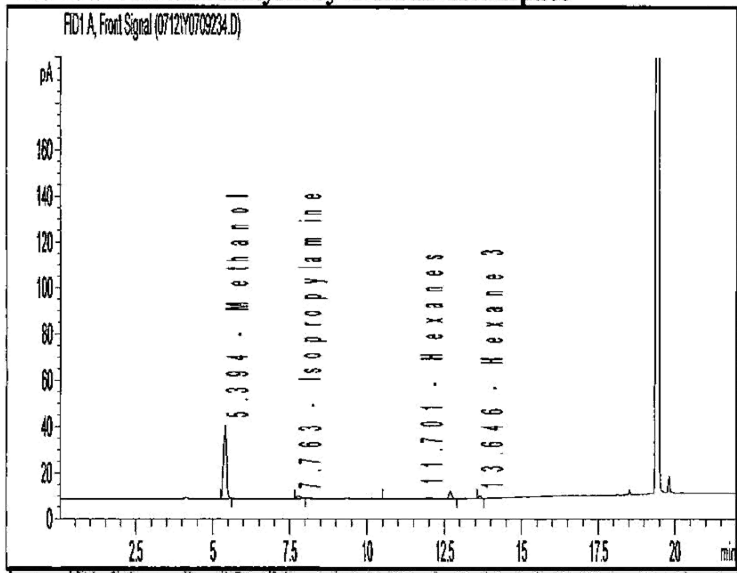

Column: DB-ALC1 30 m x 0.53 mm, 3 µm film thickness  
 Temp Program: 40°C (12 min) to 220°C at 40°C/min (5.5 min)  
 Carrier Gas: Helium  
 Flow Rate: 2.0 mL/min  
 Detector Heater Temp: 250°C  
 Injector: Headspace Sampler  
 HS Oven Temp: 60°C  
 Vial Equilibration: 10 minutes

Data File Name: S:\GC\GC-HS11\2012\0712\Y0709234.D  
 Operator: RPC  
 Instrument: GC#11  
 Sample Name: AV12066  
 Acquired: July 11, 2012 12:13 PM

| Peak         | Compound       | Area      | Weight %    |
|--------------|----------------|-----------|-------------|
| 1            | Methanol       | 219.03149 | 1.21        |
| 2            | Isopropylamine | 11.26934  | 0.01        |
| 3            | Hexanes        | 31.51361  | BQL         |
| 4            | NMP            | NA        | NA          |
| <b>Total</b> |                |           | <b>1.22</b> |

BQL - Below Quantitation Limit

## ICP Analysis

## Semi Quantitative Scan for Trace Metals

| Element | Result    | Element | Result    | Element | Result    | Element | Result    |
|---------|-----------|---------|-----------|---------|-----------|---------|-----------|
| Ag      | 4.3 ppm   | Eu      | < 0.1 ppm | Mo      | < 0.1 ppm | Se      | 0.2 ppm   |
| Al      | 1.9 ppm   | Fe      | 8.9 ppm   | Na      | 0.16 %    | Si      | 491.5 ppm |
| As      | < 0.1 ppm | Ga      | < 0.1 ppm | Nb      | < 0.1 ppm | Sm      | < 0.1 ppm |
| Au      | < 0.1 ppm | Gd      | < 0.1 ppm | Nd      | < 0.1 ppm | Sn      | 0.2 ppm   |
| B       | 0.6 ppm   | Ge      | < 0.1 ppm | Ni      | 0.2 ppm   | Sr      | < 0.1 ppm |
| Ba      | 0.5 ppm   | Hf      | < 0.1 ppm | P       | 6.3 ppm   | Ta      | < 0.1 ppm |
| Be      | < 0.1 ppm | Hg      | N/A       | Pb      | < 0.1 ppm | Tb      | < 0.1 ppm |
| Bi      | < 0.1 ppm | Ho      | < 0.1 ppm | Pd      | < 0.1 ppm | Th      | < 0.1 ppm |
| Ca      | 36.9 ppm  | In      | < 0.1 ppm | Pr      | < 0.1 ppm | Ti      | < 0.1 ppm |
| Cd      | < 0.1 ppm | Ir      | < 0.1 ppm | Pt      | < 0.1 ppm | Tl      | < 0.1 ppm |
| Ce      | < 0.1 ppm | K       | 0.4 ppm   | Rb      | < 0.1 ppm | Tm      | < 0.1 ppm |
| Co      | < 0.1 ppm | La      | < 0.1 ppm | Re      | < 0.1 ppm | U       | < 0.1 ppm |
| Cr      | 4.1 ppm   | Li      | < 0.1 ppm | Rh      | < 0.1 ppm | V       | < 0.1 ppm |
| Cu      | 0.9 ppm   | Lu      | < 0.1 ppm | Ru      | < 0.1 ppm | W       | < 0.1 ppm |
| Dy      | < 0.1 ppm | Mg      | < 0.1 ppm | Sb      | < 0.1 ppm | Y       | < 0.1 ppm |
| Er      | < 0.1 ppm | Mn      | 0.1 ppm   | Sc      | 0.4 ppm   | Yb      | < 0.1 ppm |
|         |           |         |           |         |           | Zn      | 9.4 ppm   |
|         |           |         |           |         |           | Zr      | < 0.1 ppm |

**Spectral and Physical Data (cont.)****LC/MS**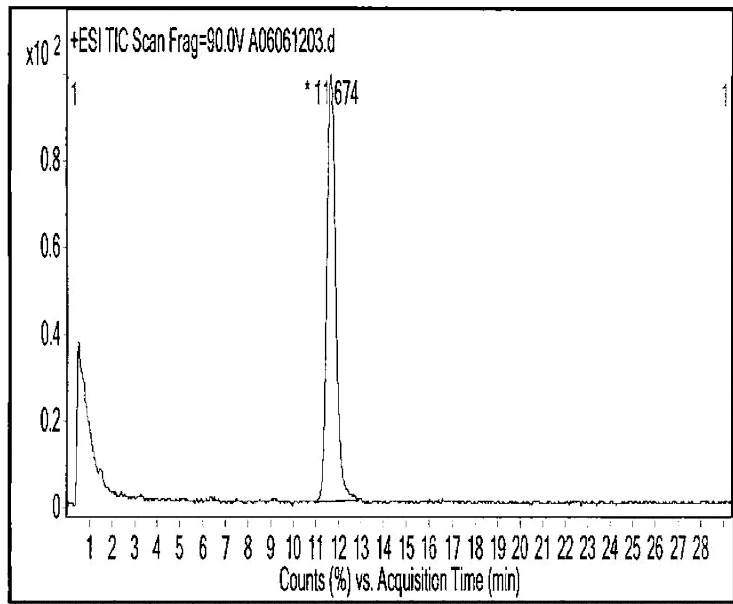

**Column:** Kinetex 2.6 $\mu$  C<sub>18</sub>, 2.1 x 50 mm  
**Mobile Phase:** Acetonitrile::0.1% Formic acid in Water (40::60)  
**Flow Rate:** 0.4 mL/min  
**Scan Range:** 100-1000 amu  
**Ionization:** Electrospray, Positive Ion

**Data File Name:** A06061203.d  
**Operator:** BBM  
**Instrument:** LC/MS/MS  
**Sample Name:** AV12066  
**Method File:** 46060C1P.m  
**Acquired:** June 6, 2012 2:19 PM

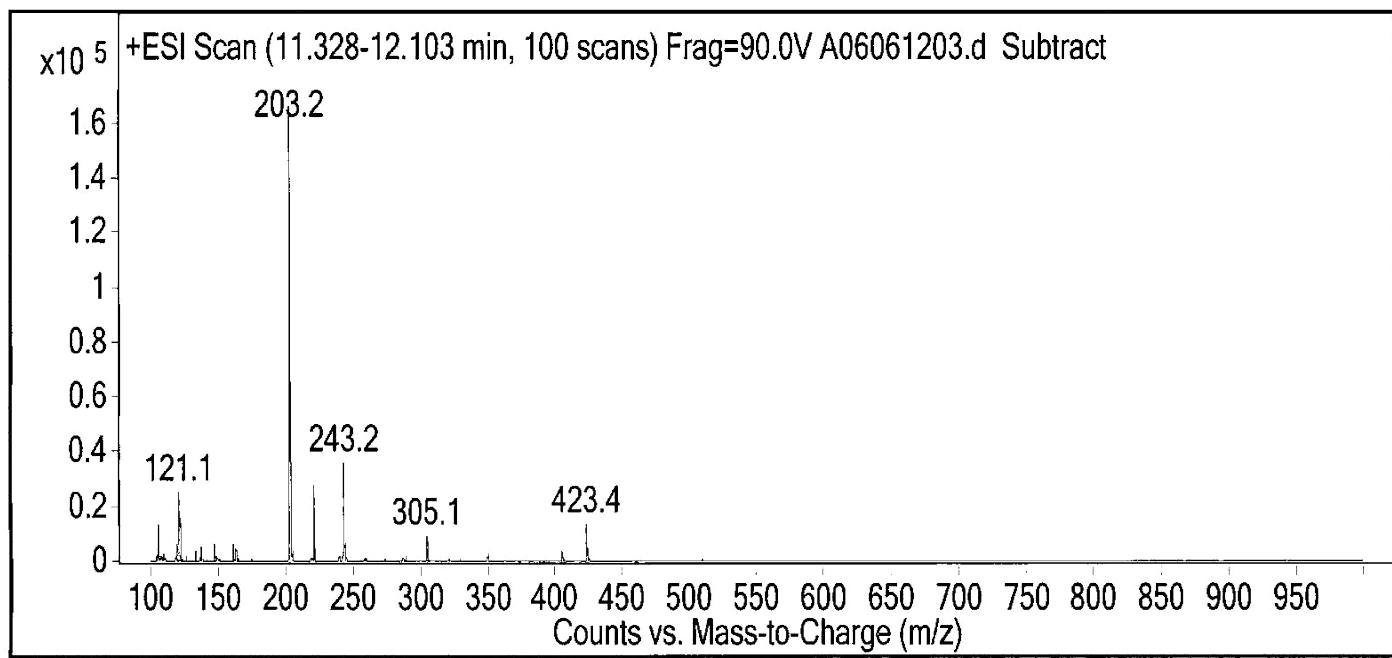

CSQ-15208  
AV12066  
Revision 0  
Page 9 of 9

*Spectral and Physical Data (cont.)*

**Thermogravimetric Analysis**

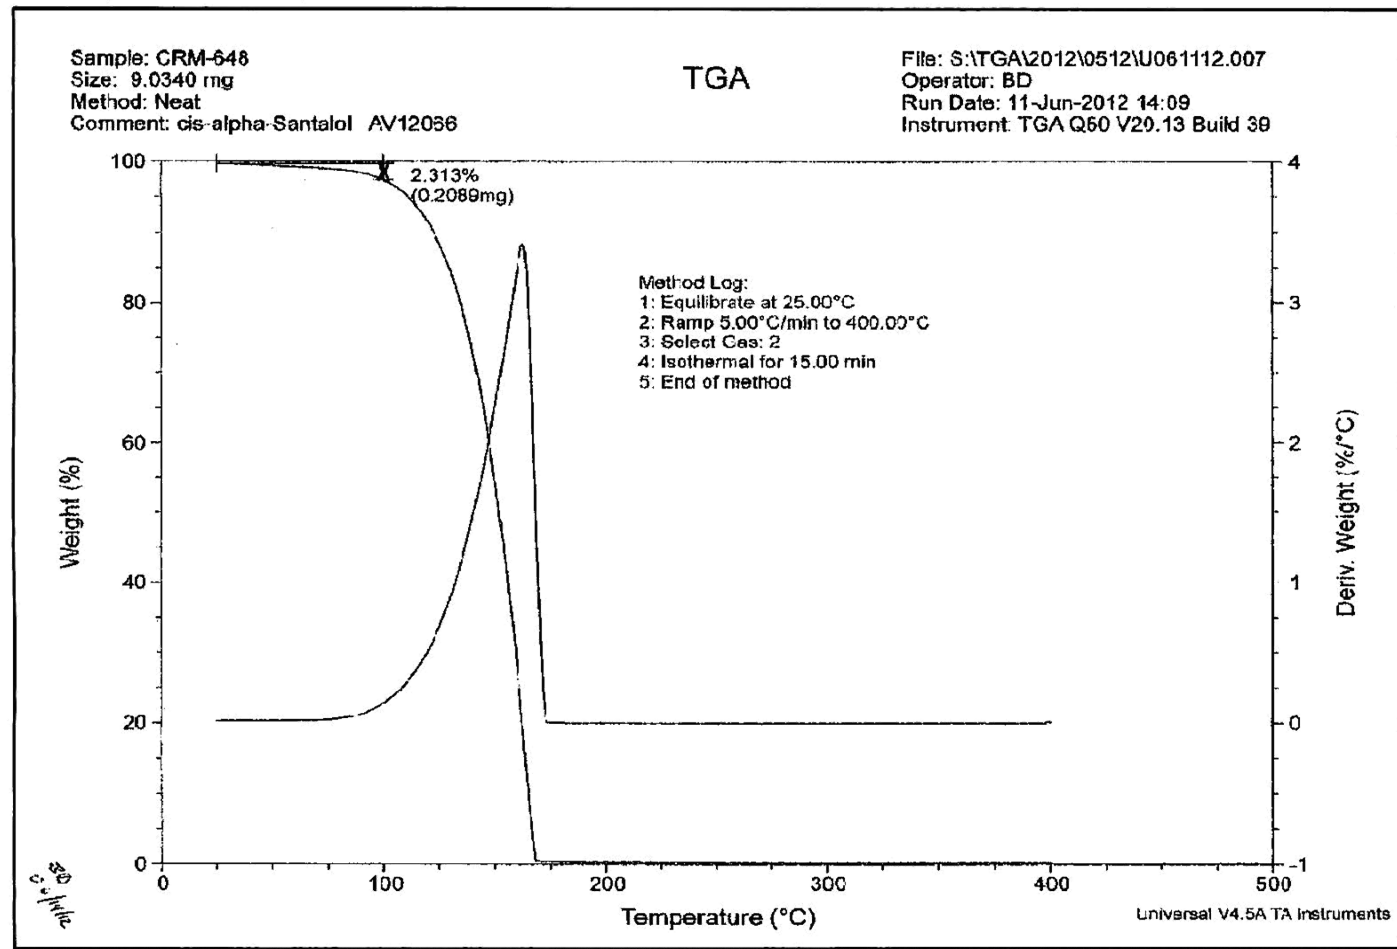

Figure. 10. Certificate of analysis ( $\beta$ -Santalol)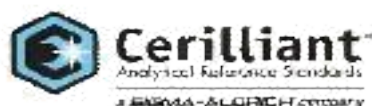

OSQ-15209  
AV12136  
Revision 0  
Page 1 of 9

# Certificate of Analysis

## cis- $\beta$ -Santalol

(2Z)-2-methyl-5-((1S,2R,4R)-2-methyl-3-oxobicyclo[2.2.1]hept-2-yl)pent-2-en-1-ol

Certificate of Analysis  
ISO GUIDE 34  
ISO/IEC 17025  
ISO 13485  
ISO 9001  
GAWQMP

Reference Number: OSQ-15209  
Lot Number: AV12136  
Retest Date: June 2013  
CAS Number: 73-42-9  
Chemical Formula:  $C_{17}H_{24}O$   
Molecular Weight: 220.35  
Chromatographic Purity: 93.2%  
Purity Factor<sup>1</sup>: 91.5%  
Storage: Refrigerate.  
Handling: As specified in the manufacturer MSDS.  
Intended Use: For R&D; analytical purposes only.

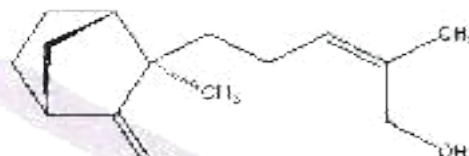

<sup>1</sup> Purity Factor =  $(100 - \text{wt\% residual solvent} - \text{wt\% residual water}) \times \text{Chromatographic Purity} / 100$

### Spectral and Physical Data

| Analytical Test                           | Method               | Results                   |
|-------------------------------------------|----------------------|---------------------------|
| Appearance                                | Vis, ml inspection   | Clear oil                 |
| Chromatographic Purity by GC/ECD Analysis | SP10-0101            | 93.2% <sup>2</sup>        |
| Identity by LC/MS Analysis                | SP10-0107            | Consistent with Structure |
| Identity by FTIR Analysis                 | SP10-0108            | Consistent with Structure |
| Identity by <sup>1</sup> H-NMR Analysis   | USP <761>, SP10-0116 | Consistent with Structure |
| Identity by <sup>13</sup> C-NMR Analysis  | USP <761>, SP10-0116 | Consistent with Structure |
| Identity by 2D-NMR Analysis               | USP <761>, SP10-0116 | Consistent with Structure |

<sup>2</sup> Purity value is the average of two independent analyses.

Cerilliant certifies the analyses detailed in this certificate are true and accurate. Retest date assigned at the request of the Customer. Cerilliant has not collected stability and makes no claims or warranty regarding shelf life or stability of material.

Authorized Signature:

Lara Sparks, Quality Assurance Director

July 16, 2012

Date

**Spectral and Physical Data (cont.)**

| <b>Analytical Test</b>                             | <b>Method</b>        | <b>Results</b>                                     |            |          |
|----------------------------------------------------|----------------------|----------------------------------------------------|------------|----------|
| Residual Solvent Analysis by GC/FID Headspace      | AM1087 <sup>3</sup>  | 1.63%                                              |            |          |
| Residual Water Analysis by Karl Fischer Coulometry | USP <921>, SP10-0103 | 0.26%                                              |            |          |
| Specific Rotation                                  | SP10-0133            | [ $\alpha$ ] <sub>D</sub> <sup>20</sup> = -95.238° |            |          |
| Elemental Analysis                                 | SP10-0117            |                                                    | Calculated | Analyzed |
|                                                    |                      | C                                                  | 81.76%     | 80.96%   |
|                                                    |                      | H                                                  | 10.98%     | 10.68%   |
|                                                    |                      | O                                                  | 7.26%      | 7.06%    |
| Inorganic Content by ICP                           | Outsourced           | Refer to results on page 7                         |            |          |
| Thermogravimetric Analysis                         | SP10-0136            | 3.92%                                              |            |          |
| Refractive Index Analysis                          | Outsourced           | 1.5012 at 25 °C                                    |            |          |

<sup>3</sup> Validated analytical method

CSQ-15209  
AV12136  
Revision 0  
Page 3 of 9

## Spectral and Physical Data (cont.)

## GC/FID

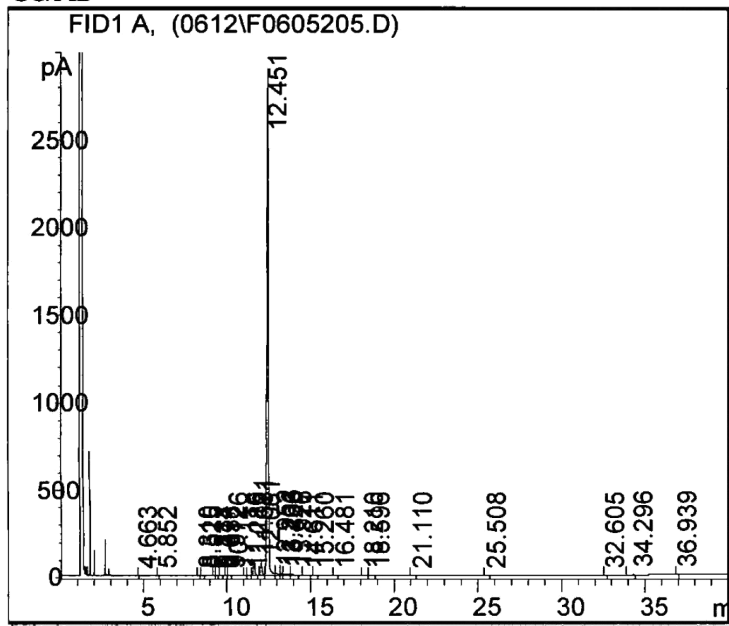

**Column:** DB-5ms, 30 m x 0.53 mm ID, 1.5 µm film thickness  
**Temp Program:** 40°C to 160°C at 40°C/min  
160°C to 210°C at 2°C/min  
210°C to 280°C at 10°C/min (hold 5 min)

**Injector Temp:** Cool-on-Column  
**Detector Temp:** 325°C

**Data File Name:** S:\GC\GC6\2012\0612\F0605205.D  
**Operator:** RPC  
**Instrument:** GC#6  
**Sample Name:** AV12136  
**Method File:** CISSANTA.M  
**Acquired:** June 5, 2012 12:39 AM

| Peak # | Ret Time | Area     | Height  | Area % | Peak # | Ret Time | Area   | Height | Area % |
|--------|----------|----------|---------|--------|--------|----------|--------|--------|--------|
| 1      | 4.66     | 0.11     | 0.08    | 0.00   | 15     | 12.95    | 142.87 | 10.13  | 0.76   |
| 2      | 5.85     | 0.45     | 0.15    | 0.00   | 16     | 13.27    | 76.05  | 8.14   | 0.40   |
| 3      | 8.31     | 1.78     | 0.44    | 0.01   | 17     | 13.43    | 82.70  | 5.69   | 0.44   |
| 4      | 8.53     | 2.11     | 0.51    | 0.01   | 18     | 13.93    | 27.22  | 1.71   | 0.14   |
| 5      | 9.23     | 1.03     | 0.25    | 0.01   | 19     | 14.61    | 1.95   | 0.20   | 0.01   |
| 6      | 9.38     | 2.02     | 0.43    | 0.01   | 20     | 15.26    | 1.45   | 0.21   | 0.01   |
| 7      | 9.63     | 1.02     | 0.21    | 0.01   | 21     | 16.48    | 2.09   | 0.27   | 0.01   |
| 8      | 9.97     | 1.12     | 0.26    | 0.01   | 22     | 18.21    | 0.69   | 0.07   | 0.00   |
| 9      | 10.13    | 5.24     | 0.82    | 0.03   | 23     | 18.60    | 0.53   | 0.06   | 0.00   |
| 10     | 11.12    | 2.04     | 0.38    | 0.01   | 24     | 21.11    | 1.06   | 0.11   | 0.01   |
| 11     | 11.29    | 11.78    | 2.06    | 0.06   | 25     | 25.51    | 0.43   | 0.04   | 0.00   |
| 12     | 11.63    | 442.24   | 78.39   | 2.35   | 26     | 32.61    | 0.85   | 0.19   | 0.00   |
| 13     | 12.06    | 428.62   | 71.14   | 2.27   | 27     | 34.30    | 6.49   | 1.88   | 0.03   |
| 14     | 12.45    | 17599.20 | 2846.98 | 93.40  | 28     | 36.94    | 0.43   | 0.09   | 0.00   |

CSQ-15209  
AV12136  
Revision 0  
Page 4 of 9

*Spectral and Physical Data (cont.)*

**Identity by FTIR Analysis**

**Instrument:** Perkin Elmer Spectrum One  
**Matrix:** Neat  
**Scans:** 32

Date: 6/7/2012

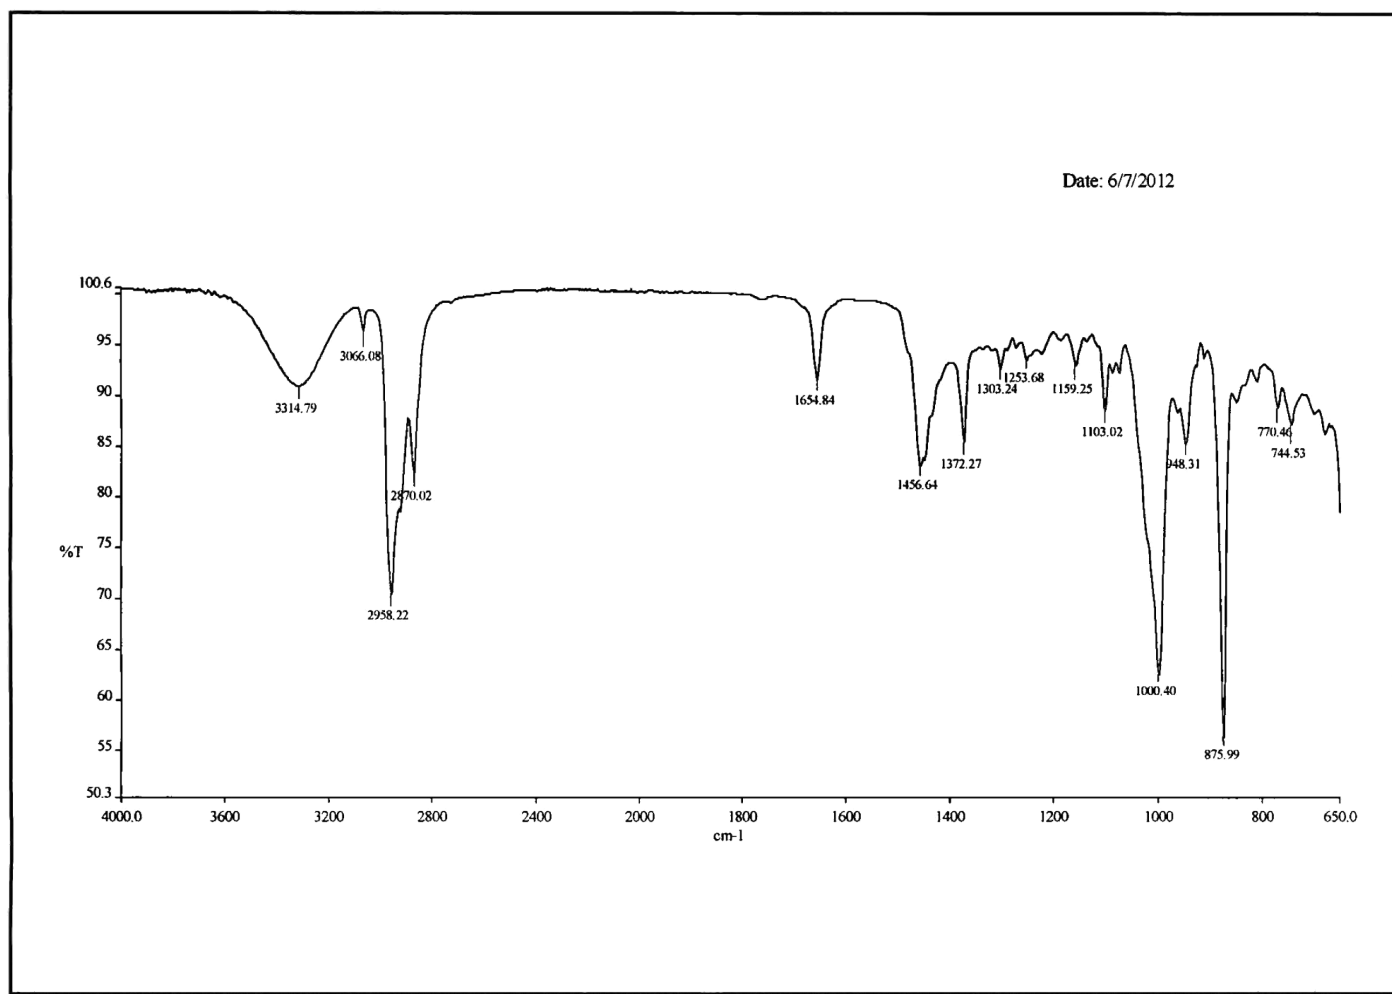



*Spectral and Physical Data (cont.)*<sup>1</sup>H NMRInstrument: JEOL ECS 400  
Solvent: Chloroform-D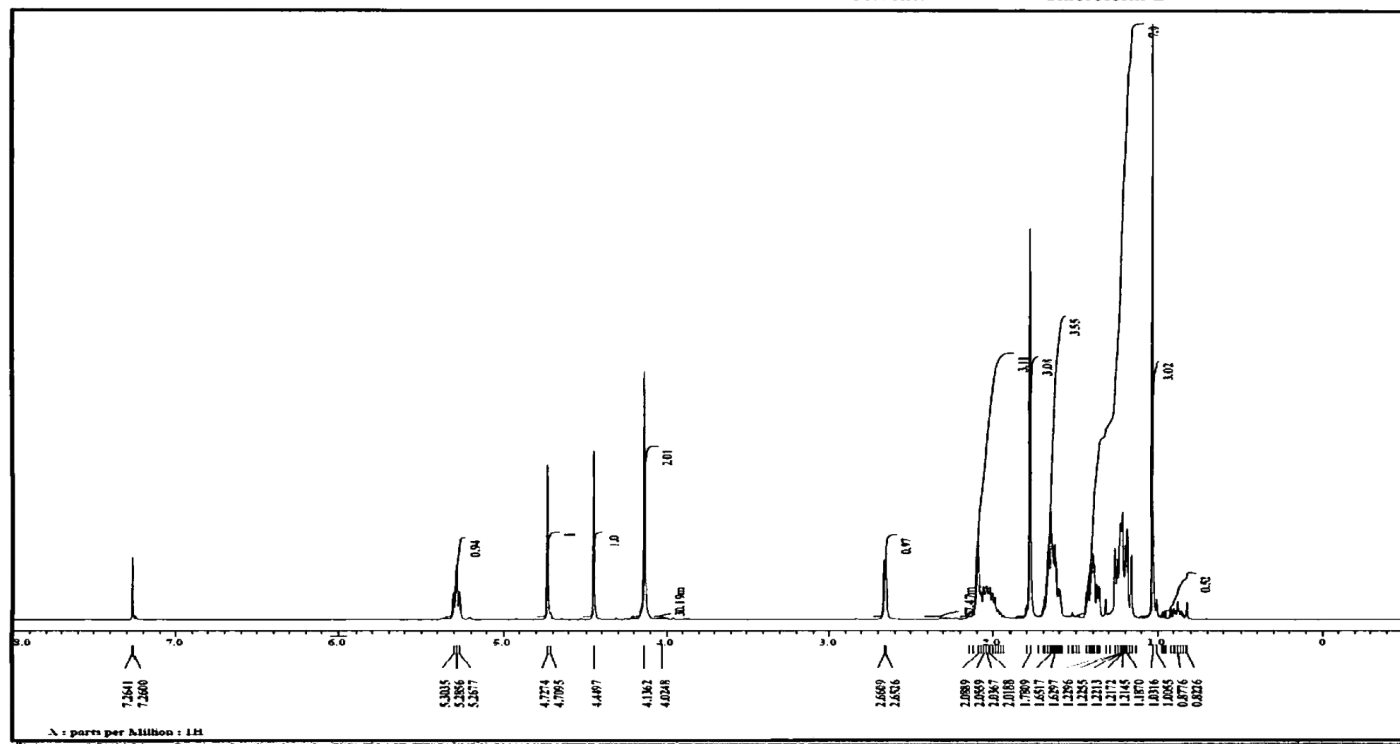<sup>13</sup>C NMRInstrument: JEOL ECS 400  
Solvent: Chloroform-D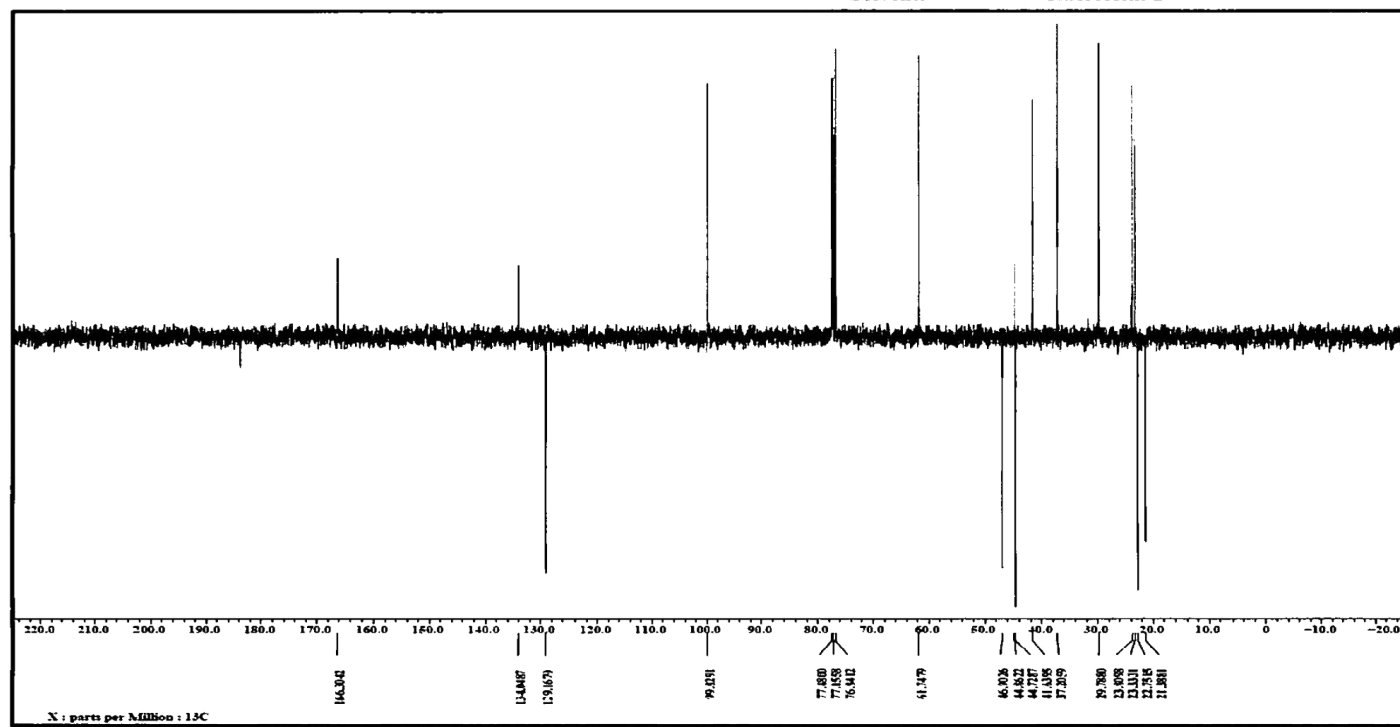

*Spectral and Physical Data (cont.)*

2D NMR

Instrument: JEOL ECS 400  
Solvent: Chloroform-D

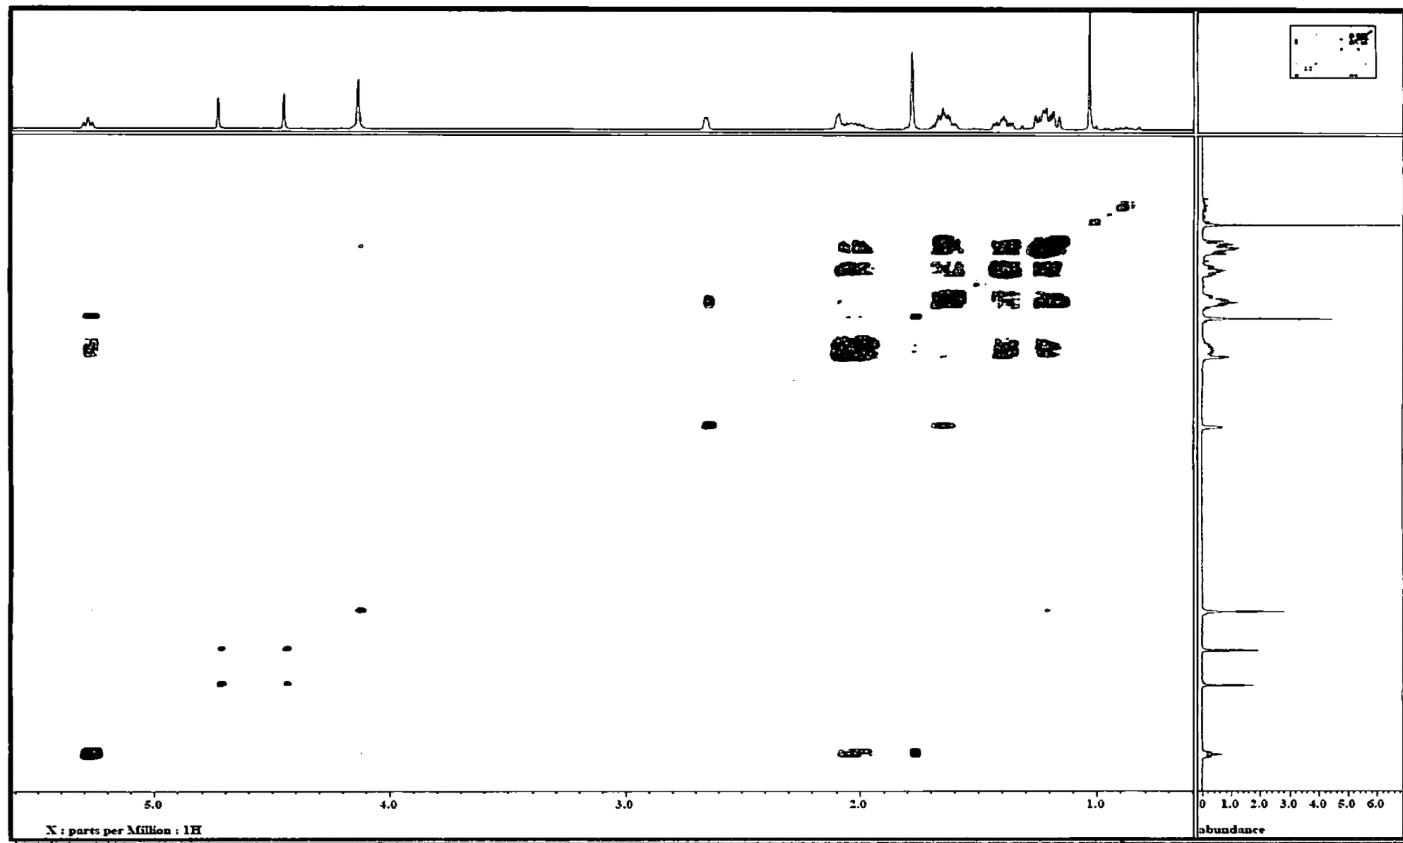

CSQ-15209

AV12136

Revision 0

Page 7 of 9

## Spectral and Physical Data (cont.)

## Residual Solvent Analysis by GC/FID Headspace

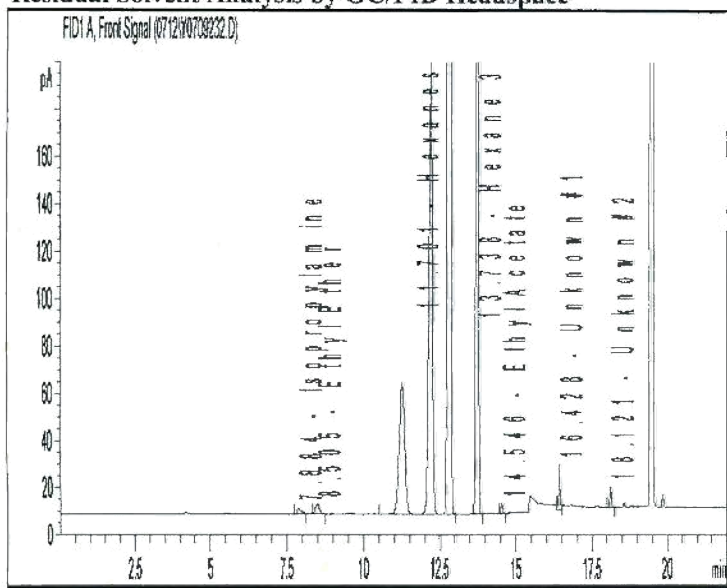

**Column:** DB-ALC1 30 m x 0.53 mm, 3 µm film thickness  
**Temp Program:** 40°C (12 min) to 220°C at 40°C/min (5.5 min)  
**Carrier Gas:** Helium  
**Flow Rate:** 2.0 mL/min  
**Detector Heater Temp:** 250°C  
**Injector:** Headspace Sampler  
**HS Oven Temp:** 60°C  
**Vial Equilibration:** 10 minutes  
  
**Data File Name:** S:\GC\GC-HS11\2012\0712\Y0709232.D  
**Operator:** BD  
**Instrument:** GC#11  
**Sample Name:** AV12136  
**Acquired:** July 11, 2012 11:15 AM

| Peak         | Compound       | Area        | Weight %    |
|--------------|----------------|-------------|-------------|
| 1            | Isopropylamine | 19.82406    | 0.01        |
| 2            | Ethyl ether    | 37.21335    | BQL         |
| 3            | Hexanes        | 11448.65283 | 1.60        |
| 4            | Ethyl acetate  | 15.53636    | 0.03        |
| 5            | Unknown # 1    | 65.3055     | BQL         |
| 6            | Unknown # 2    | 31.47961    | BQL         |
| 7            | NMP            | NA          | NA          |
| <b>Total</b> |                |             | <b>1.63</b> |

BQL - Below Quantitation Limit

## ICP Analysis

## Semi Quantitative Scan for Trace Metals

| Element | Result    | Element | Result    | Element | Result    | Element | Result    |
|---------|-----------|---------|-----------|---------|-----------|---------|-----------|
| Ag      | 0.6 ppm   | Eu      | < 0.1 ppm | Mg      | < 0.1 ppm | Se      | 0.1 ppm   |
| Al      | 2.3 ppm   | Fe      | 40.2 ppm  | Na      | 774.1 ppm | Si      | 310.0 ppm |
| As      | < 0.1 ppm | Ga      | < 0.1 ppm | Nb      | < 0.1 ppm | Sm      | < 0.1 ppm |
| Au      | < 0.1 ppm | Gd      | < 0.1 ppm | Nd      | < 0.1 ppm | Sr      | 0.3 ppm   |
| B       | 0.9 ppm   | Ge      | < 0.1 ppm | Ni      | 0.1 ppm   | Sr      | < 0.1 ppm |
| Ba      | 0.6 ppm   | Hf      | < 0.1 ppm | P       | 17.6 ppm  | Ta      | < 0.1 ppm |
| Be      | < 0.1 ppm | Hg      | N/A       | Pb      | < 0.1 ppm | Tb      | < 0.1 ppm |
| Bi      | < 0.1 ppm | Ho      | < 0.1 ppm | Pd      | < 0.1 ppm | Ti      | < 0.1 ppm |
| Ca      | 16.0 ppm  | In      | < 0.1 ppm | Pr      | < 0.1 ppm | Tl      | 0.3 ppm   |
| Cd      | < 0.1 ppm | Ir      | < 0.1 ppm | Pt      | < 0.1 ppm | Ti      | < 0.1 ppm |
| Ce      | < 0.1 ppm | K       | 9.9 ppm   | Rb      | < 0.1 ppm | Tm      | < 0.1 ppm |
| Co      | < 0.1 ppm | La      | < 0.1 ppm | Re      | < 0.1 ppm | U       | < 0.1 ppm |
| Cr      | 2.0 ppm   | Li      | < 0.1 ppm | Rh      | < 0.1 ppm | V       | < 0.1 ppm |
| Cu      | 1.2 ppm   | Lu      | < 0.1 ppm | Ru      | < 0.1 ppm | W       | < 0.1 ppm |
| Dy      | < 0.1 ppm | Mg      | < 0.1 ppm | Sb      | < 0.1 ppm | Y       | < 0.1 ppm |
| Er      | < 0.1 ppm | Mn      | < 0.1 ppm | Sc      | 0.3 ppm   | Yb      | < 0.1 ppm |
|         |           |         |           |         |           | Zn      | 11.3 ppm  |
|         |           |         |           |         |           | Zr      | < 0.1 ppm |

*Spectral and Physical Data (cont.)*

## LC/MS

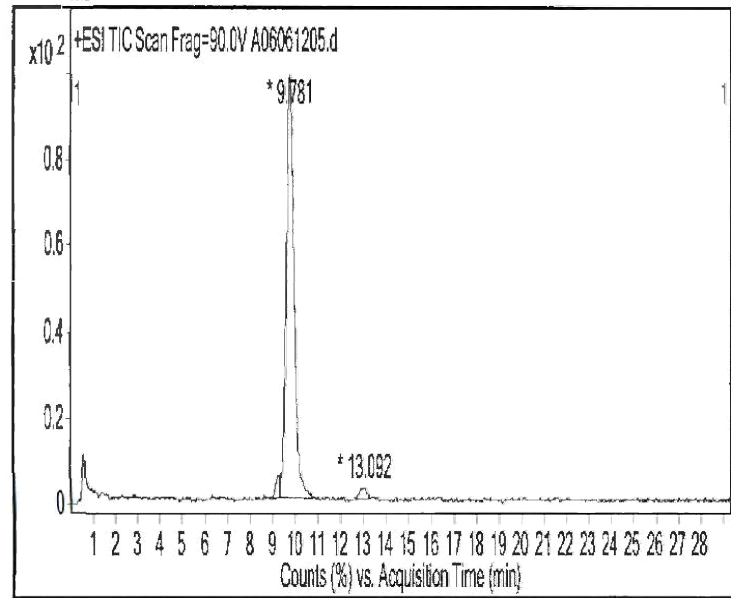

**Column:** Kinetex 2.6 $\mu$  C<sub>18</sub>, 2.1 x 50 mm  
**Mobile Phase:** Acetonitrile:0.1% Formic acid in Water (40.:60)  
**Flow Rate:** 0.4 mL/min  
**Scan Range:** 100-1000 amu  
**Ionization:** Electrospray, Positive Ion

**Data File Name:** A06061205.d  
**Operator:** BBM  
**Instrument:** LC/MS/MS  
**Sample Name:** AV12163  
**Method File:** 46060C1P.m  
**Acquired:** June 6, 2012 4:27 PM

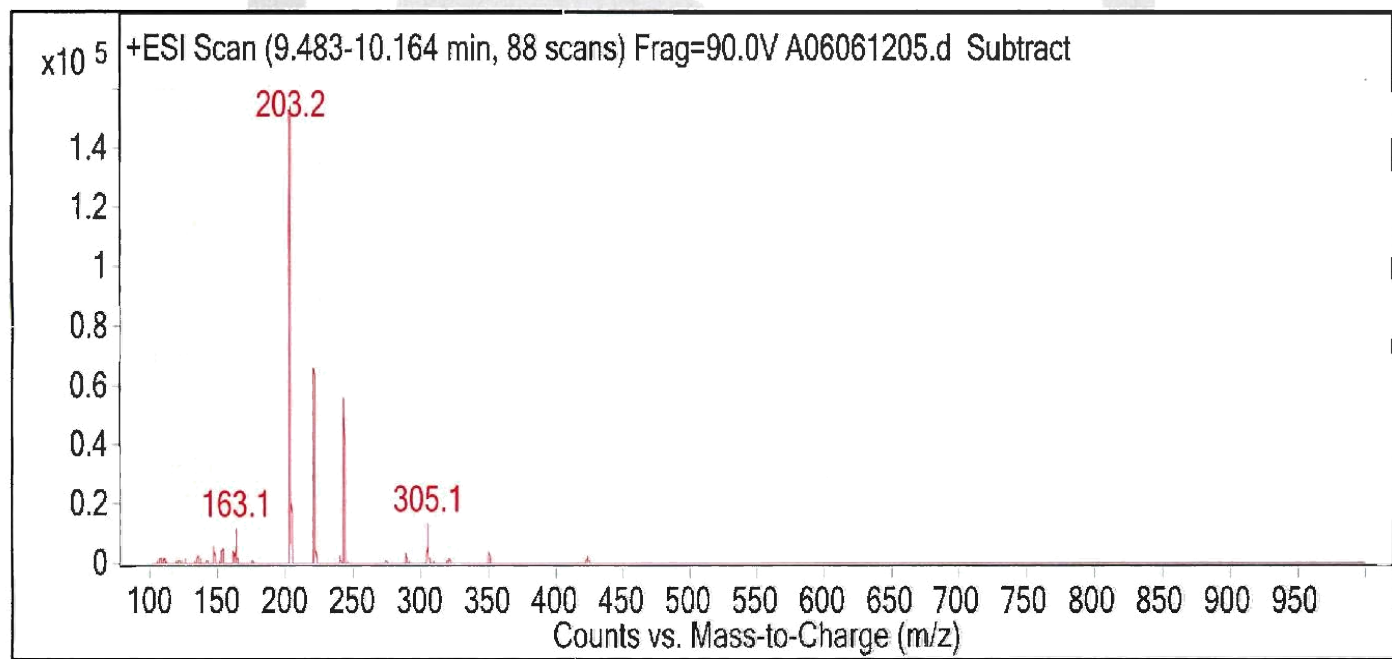

*Spectral and Physical Data (cont.)*

**Thermogravimetric Analysis**

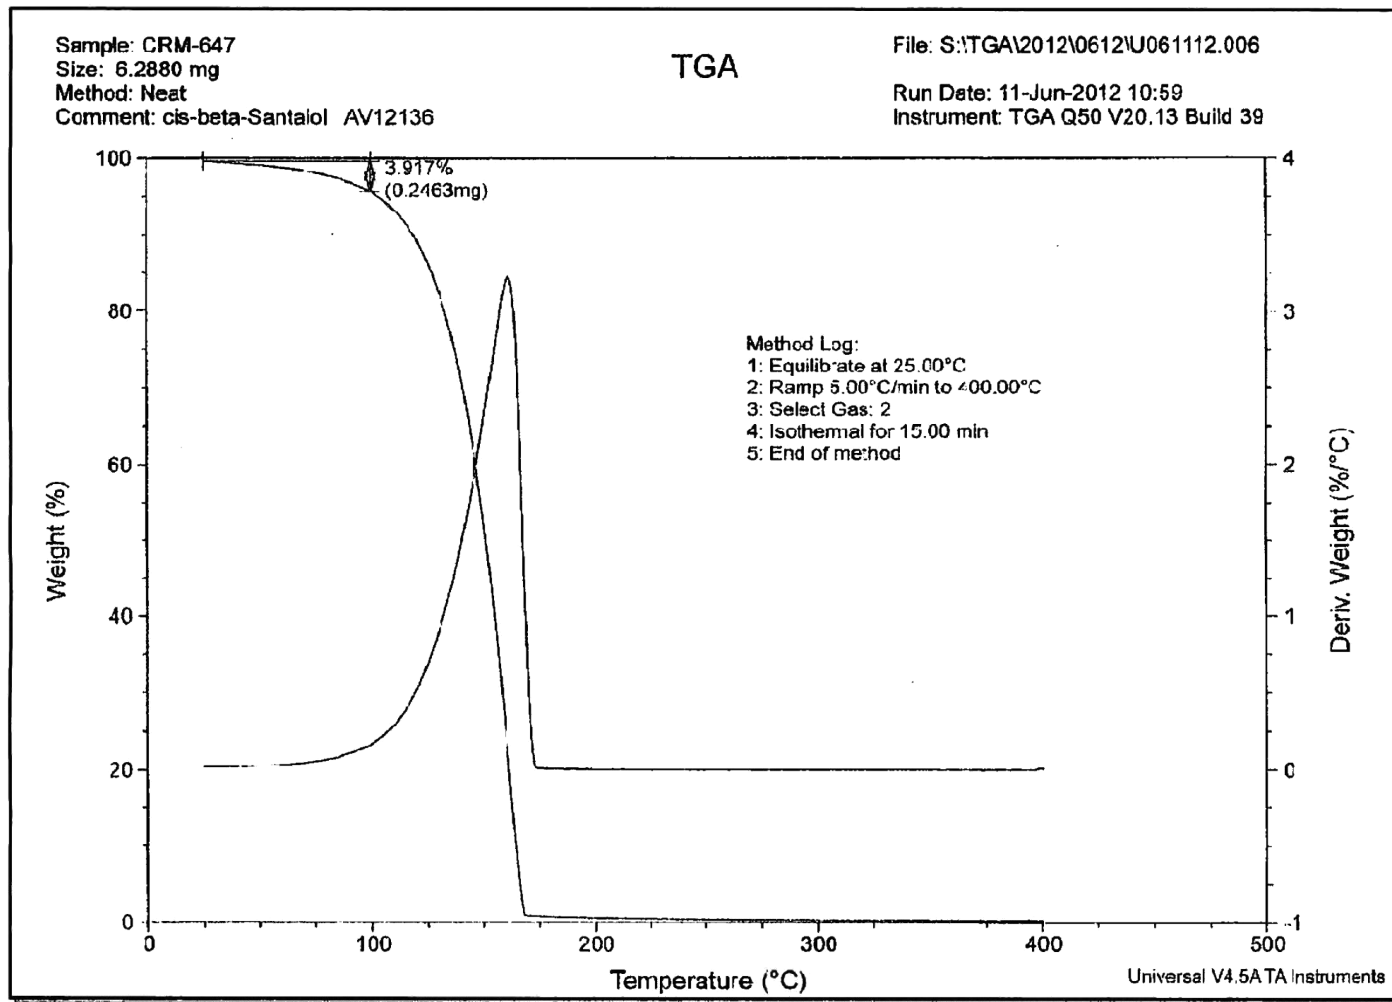

Supplement: c8ra05195j1.pdf [file c8ra05195j1.pdf]
